# Supplementary material for: Effective SLOPE: EffectS of Lifestyle interventions in Older PEople with obesity: a systematic review and network meta-analysis protocol
Source: PubMed Central journal article supplement — BMJ Open. 2020 Oct 7;10(10):e038330. doi: 10.1136/bmjopen-2020-038330 (PMC7542917; doi:10.1136/bmjopen-2020-038330), 2020-10-07
Supplement: bmjopen-2020-038330.draft_revisions.pdf [file bmjopen-2020-038330.draft_revisions.pdf]

# BMJ Open

BMJ Open is committed to open peer review. As part of this commitment we make the peer review history of every article we publish publicly available.

When an article is published we post the peer reviewers' comments and the authors' responses online. We also post the versions of the paper that were used during peer review. These are the versions that the peer review comments apply to.

The versions of the paper that follow are the versions that were submitted during the peer review process. They are not the versions of record or the final published versions. They should not be cited or distributed as the published version of this manuscript.

BMJ Open is an open access journal and the full, final, typeset and author-corrected version of record of the manuscript is available on our site with no access controls, subscription charges or pay-per-view fees (<http://bmjopen.bmj.com>).

If you have any questions on BMJ Open's open peer review process please email [info.bmjopen@bmj.com](mailto:info.bmjopen@bmj.com)

# BMJ Open

## Effective SLOPE: EffectS of Lifestyle interventions in Older PEople with obesity – a systematic review and network meta-analysis protocol

|                               |                                                                                                                                                                                                                                                                                                                                                                                                                                                                                                                                                                                                                                                                                                                                                                                                                                                                                                                                                                                                                                                                                                                                                                                                                                                                                                                                                                                                                                                                                                                                                                                                                                |
|-------------------------------|--------------------------------------------------------------------------------------------------------------------------------------------------------------------------------------------------------------------------------------------------------------------------------------------------------------------------------------------------------------------------------------------------------------------------------------------------------------------------------------------------------------------------------------------------------------------------------------------------------------------------------------------------------------------------------------------------------------------------------------------------------------------------------------------------------------------------------------------------------------------------------------------------------------------------------------------------------------------------------------------------------------------------------------------------------------------------------------------------------------------------------------------------------------------------------------------------------------------------------------------------------------------------------------------------------------------------------------------------------------------------------------------------------------------------------------------------------------------------------------------------------------------------------------------------------------------------------------------------------------------------------|
| Journal:                      | <i>BMJ Open</i>                                                                                                                                                                                                                                                                                                                                                                                                                                                                                                                                                                                                                                                                                                                                                                                                                                                                                                                                                                                                                                                                                                                                                                                                                                                                                                                                                                                                                                                                                                                                                                                                                |
| Manuscript ID                 | bmjopen-2020-038330                                                                                                                                                                                                                                                                                                                                                                                                                                                                                                                                                                                                                                                                                                                                                                                                                                                                                                                                                                                                                                                                                                                                                                                                                                                                                                                                                                                                                                                                                                                                                                                                            |
| Article Type:                 | Protocol                                                                                                                                                                                                                                                                                                                                                                                                                                                                                                                                                                                                                                                                                                                                                                                                                                                                                                                                                                                                                                                                                                                                                                                                                                                                                                                                                                                                                                                                                                                                                                                                                       |
| Date Submitted by the Author: | 06-Mar-2020                                                                                                                                                                                                                                                                                                                                                                                                                                                                                                                                                                                                                                                                                                                                                                                                                                                                                                                                                                                                                                                                                                                                                                                                                                                                                                                                                                                                                                                                                                                                                                                                                    |
| Complete List of Authors:     | <p>Torbahn, Gabriel; Friedrich-Alexander-Universität Erlangen-Nürnberg Medizinische Fakultät, Institute for Biomedicine of Aging</p> <p>Schoene, Daniel; Friedrich-Alexander-Universität Erlangen-Nürnberg, Institute of Medical Physics</p> <p>Schwingshackl, Lukas; Medical Center - University of Freiburg, Faculty of Medicine, Institute for Evidence in Medicine</p> <p>Rücker, Gerta; Medical Center - University of Freiburg, Faculty of Medicine, Institute of Medical Biometry and Medical Informatics</p> <p>Knüttel, Helge; University of Regensburg, University Library</p> <p>Kemmler, W; University of Erlangen-Nürnberg, Institute of Medical Physics</p> <p>Sieber, Cornel; Friedrich-Alexander-Universität Erlangen-Nürnberg, Institute for Biomedicine of Aging; Kantonsspital Winterthur, Department of Medicine</p> <p>Batsis, John; Dartmouth-Hitchcock Medical Center, and the Dartmouth Centers for Health and Aging, Sections of General Internal Medicine and Weight and Wellness; Dartmouth College Institute for Health Policy and Clinical Practice, Geisel School of Medicine at Dartmouth</p> <p>Villareal, Dennis; Baylor College of Medicine, Division of Endocrinology, Diabetes and Metabolism</p> <p>Ströbele-Benschop, Nanette; University of Hohenheim, Department of Nutritional Psychology, Institute of Nutritional Medicine</p> <p>Volkert, Dorothee; Friedrich-Alexander-Universität Erlangen-Nürnberg, Institute for Biomedicine of Aging</p> <p>Kiesswetter, Eva; Friedrich-Alexander-Universität Erlangen-Nürnberg Medizinische Fakultät, Institute for Biomedicine of Aging</p> |
| Keywords:                     | GERIATRIC MEDICINE, NUTRITION & DIETETICS, SPORTS MEDICINE                                                                                                                                                                                                                                                                                                                                                                                                                                                                                                                                                                                                                                                                                                                                                                                                                                                                                                                                                                                                                                                                                                                                                                                                                                                                                                                                                                                                                                                                                                                                                                     |
|                               |                                                                                                                                                                                                                                                                                                                                                                                                                                                                                                                                                                                                                                                                                                                                                                                                                                                                                                                                                                                                                                                                                                                                                                                                                                                                                                                                                                                                                                                                                                                                                                                                                                |

SCHOLARONE™  
Manuscripts

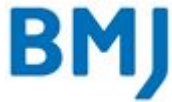

I, the Submitting Author has the right to grant and does grant on behalf of all authors of the Work (as defined in the below author licence), an exclusive licence and/or a non-exclusive licence for contributions from authors who are: i) UK Crown employees; ii) where BMJ has agreed a CC-BY licence shall apply, and/or iii) in accordance with the terms applicable for US Federal Government officers or employees acting as part of their official duties; on a worldwide, perpetual, irrevocable, royalty-free basis to BMJ Publishing Group Ltd ("BMJ") its licensees and where the relevant Journal is co-owned by BMJ to the co-owners of the Journal, to publish the Work in this journal and any other BMJ products and to exploit all rights, as set out in our [licence](#).

The Submitting Author accepts and understands that any supply made under these terms is made by BMJ to the Submitting Author unless you are acting as an employee on behalf of your employer or a postgraduate student of an affiliated institution which is paying any applicable article publishing charge ("APC") for Open Access articles. Where the Submitting Author wishes to make the Work available on an Open Access basis (and intends to pay the relevant APC), the terms of reuse of such Open Access shall be governed by a Creative Commons licence – details of these licences and which [Creative Commons](#) licence will apply to this Work are set out in our licence referred to above.

Other than as permitted in any relevant BMJ Author's Self Archiving Policies, I confirm this Work has not been accepted for publication elsewhere, is not being considered for publication elsewhere and does not duplicate material already published. I confirm all authors consent to publication of this Work and authorise the granting of this licence.

**Title:**

Effective SLOPE: EffectS of Lifestyle interventions in Older PEople with obesity – a systematic review and network meta-analysis protocol

**Authors and institutions:**

Gabriel Torbahn<sup>1</sup>, Daniel Schoene<sup>2</sup>, Lukas Schwingshackl<sup>3</sup>, Gerta Rücker<sup>4</sup>, Helge Knüttel<sup>5</sup>, Wolfgang Kemmler<sup>2</sup>, Cornel C. Sieber<sup>1,6</sup>, John A. Batsis<sup>7,8</sup>, Dennis T. Villareal<sup>9</sup>, Nanette Stroebele-Benschop<sup>10</sup>, Dorothee Volkert<sup>1</sup>, Eva Kiesswetter<sup>1</sup>

<sup>1</sup> Institute for Biomedicine of Aging, Friedrich-Alexander-Universität Erlangen-Nürnberg, Nuremberg, Germany

<sup>2</sup> Institute of Medical Physics, Friedrich-Alexander-Universität Erlangen-Nürnberg, Erlangen, Germany

<sup>3</sup> Institute for Evidence in Medicine, Medical Center - University of Freiburg, Faculty of Medicine, University of Freiburg, Freiburg, Germany

<sup>4</sup> Institute of Medical Biometry and Statistics, Medical Center - University of Freiburg, Faculty of Medicine, University of Freiburg, Freiburg, Germany

<sup>5</sup> University Library, University of Regensburg, Regensburg, Germany

<sup>6</sup> Department of Medicine, Kantonsspital Winterthur, Winterthur, Switzerland

<sup>7</sup> Sections of General Internal Medicine and Weight and Wellness, Dartmouth-Hitchcock Medical Center, and the Dartmouth Centers for Health and Aging, Lebanon, NH, USA

<sup>8</sup> Geisel School of Medicine at Dartmouth, The Dartmouth Institute for Health Policy and Clinical Practice, Dartmouth College, Hanover, NH, USA

<sup>9</sup> Division of Endocrinology, Diabetes and Metabolism, Baylor College of Medicine, Houston, TX, USA

<sup>10</sup> Institute of Nutritional Medicine, Department of Nutritional Psychology, University of Hohenheim, Stuttgart, Germany

**Corresponding author:**

Gabriel Torbahn, MPH

Institute for Biomedicine of Aging, Friedrich-Alexander-Universität Erlangen Nürnberg

Kobergerstr. 60

90408 Nürnberg

Germany

E-Mail: [gabriel.torbahn@fau.de](mailto:gabriel.torbahn@fau.de)

Phone: +49 911 530 296 165

**Word count** (excluding title page, abstract, references, figures and tables, max 4000 words):  
3620

## Abstract

### Introduction

Obesity is highly prevalent in older adults aged 65 years or older. Different lifestyle interventions (diet, exercise, behavioural) are available but benefits and harms have not been fully quantified comparing all available health promotion interventions. Special consideration must be given to functional outcomes and possible adverse effects (loss of muscle and bone mass, hypoglycaemia) of weight loss interventions in this age group. The objective of this study is to synthesize the evidence regarding the effects of different types and modalities of lifestyle interventions, or their combinations, on physical function and obesity-related outcomes such as body composition in older adults with obesity.

### Methods and analyses

Six databases (Medline, Embase, Cochrane Central Register of Controlled Trials, Cinahl, Psychinfo and Web of Science) and two trial registries (Clinicaltrials.gov and the WHO International Clinical Trials Registry Platform) will be searched for randomised controlled trials of lifestyle interventions in older adults with obesity. Screening (title/abstract and full-text) and data extraction of references as well as assessment of risk of bias and rating of the certainty of evidence (Grading of Recommendations, Assessment, Development and Evaluation (GRADE) for network meta-analyses) will be performed by two reviewers independently. Frequentist random-effects network meta-analyses will be conducted to determine the pooled effects from each intervention.

### Ethics and dissemination

We will submit our findings to peer-reviewed journals and present at national and international conferences as well as in scientific medical societies. Patient-targeted dissemination will involve local and national advocate groups.

### PROSPERO registration number

CRD42019147286

### Strengths and limitations of this study

- This will be the first NMA on lifestyle interventions in older adults with obesity
- Rather than focussing on weight loss, physical functioning will be the primary interest due to its subjective and objective relevance for older people

- 1  
2  
3 - Methods will be applied based on the standards of the updated version 6.0 of the Cochrane  
4 Handbook for Interventions (updated July 2019)  
5  
6  
7 - Recommendations will be derived based on the results according to the GRADE approach for  
8 NMA  
9  
10 - Heterogeneity (clinical and statistical) will be evaluated and discussed in detail  
11  
12  
13  
14  
15  
16  
17  
18  
19  
20  
21  
22  
23  
24  
25  
26  
27  
28  
29  
30  
31  
32  
33  
34  
35  
36  
37  
38  
39  
40  
41  
42  
43  
44  
45  
46  
47  
48  
49  
50  
51  
52  
53  
54  
55  
56  
57  
58  
59  
60

For peer review only

## Introduction

Obesity is defined as an abnormal and excessive accumulation of body fat,<sup>1</sup> while on a population-level, is defined using a body mass index (BMI)  $\geq 30$  kg/m<sup>2</sup>. Over the past four decades, the prevalence of obesity has been increasing worldwide across all age groups.<sup>2</sup> The rates of obesity in older adults, the fastest growing population segment<sup>3</sup> have now exceeded 40%, making this a public health concern.<sup>4</sup> As BMI has poor sensitivity in older adults due to age-related changes in body composition and a reduction of body height,<sup>5</sup> waist circumference and, more directly, objectively-measured fat mass can be considered in ascertaining obesity. In the United States, central obesity measured using waist circumference has been found in ~63% of community-dwelling adults aged  $\geq 60$  years.<sup>6</sup> The prevalence of obesity according to a high proportion of fat mass is 64% and 77% in German women and men  $\geq 70$  years respectively.<sup>7,8</sup> Due to the higher mechanical load of a higher body weight, for a long time obesity has not been linked to a low proportion of muscle mass. However, in recent years, sarcopenic obesity, a syndrome combining obesity with low muscle mass and strength or physical function has gained considerable attention. Sarcopenic obesity is a largely underdiagnosed condition in clinical practice, and prevalence rates of up to 94% in older adults depending on the operationalization of this construct have been reported.<sup>9</sup>

In community-dwelling older adults, (sarcopenic) obesity is associated with increased mortality<sup>10,11</sup> as well as with reduced quality of life (QoL).<sup>12,13</sup> Obesity is a well-known risk factor for metabolic and cardiovascular diseases, pulmonary abnormalities and certain types of cancer in older age.<sup>14</sup> Furthermore, obesity is associated with the onset of osteoarthritis in older adults,<sup>15</sup> one of the most disabling medical conditions, severely affecting one's QoL.<sup>16</sup> A meta-analysis of 26 prospective studies in older adults revealed obesity as risk factor for functional decline<sup>17</sup> which is of utmost importance for independent living.<sup>18,19</sup> Older adults with sarcopenic obesity are considered a group at particular risk for functional limitations as they are suffering from two conditions determining functional disability simultaneously.<sup>20,21</sup> Moreover, in older people (sarcopenic) obesity is associated with an increased risk of falls<sup>22-25</sup> and nursing home admissions.<sup>26</sup> Alley and colleagues have predicted that given the increasing prevalence of obesity, a disabled older person with obesity may become the most common phenotype of frailty<sup>27</sup> – another syndrome in the geriatric population that is associated with decline in health and function<sup>28,29</sup> – posing a marked personal and societal burden. In 2015, a high BMI contributed to about 120 million disability-adjusted life years (DALY) representing

1  
2  
3 ~5% of DALYs from any causes among adults worldwide.<sup>2</sup> A recent systematic review found  
4 that compared to healthy weight, the total annual health care costs are 30% (interquartile  
5 range: 20-34%) higher in middle-aged and older people with obesity.<sup>30</sup> An analysis of the  
6 World Obesity Foundation in 2017 has forecasted that costs of consequences of overweight  
7 and obesity will further increase in the future.<sup>31</sup>  
8  
9

10  
11  
12 Although other therapeutic options to treat obesity exist (e.g. bariatric surgery), lifestyle  
13 strategies should always be first-line treatment.<sup>32-34</sup> Lifestyle interventions mainly focus on  
14 diet, exercise, behavioural or combined strategies that vary in treatment modality (e.g.  
15 specific content), type of delivery (e.g. level of supervision) and dose. Due to higher levels of  
16 multimorbidity, frailty, sarcopenia and malnutrition risk, findings from younger people cannot  
17 be generalised to older people.<sup>35</sup> Moreover, harmful side effects of interventions aiming at  
18 weight loss have to be considered, such as the loss of muscle mass<sup>36</sup> and bone mineral  
19 density.<sup>37</sup> Thus, in older people at risk of adverse events functional decline, functional  
20 limitations as well as falls and fracture risk may be increased.<sup>38</sup> Very low caloric diets may  
21 lead/contribute to an inadequate intake of nutrients and consequently to the development of  
22 malnutrition.<sup>39</sup> In addition, perceived and actual barriers differ between younger and older  
23 adults in their impact on adopting lifestyle changes.<sup>40</sup> Despite these issues, obesity treatment  
24 in older adults is still not sufficiently addressed in existing obesity guidelines.<sup>33 41 42</sup>  
25  
26  
27  
28  
29  
30  
31  
32  
33  
34  
35

36  
37 Several systematic reviews on obesity treatment in older adults published between 2006-  
38 2019<sup>43-53</sup> generally agree that weight-loss interventions in older adults are safe and effective  
39 in reducing weight. Combined interventions (e. g, including dietary and exercise components)  
40 are to be favoured to preserve muscle mass, bone mineral density and to improve physical  
41 performance. However, behavioural and educational strategies, which are known to be  
42 important for the long-term weight maintenance from studies in younger adults,<sup>54</sup> have been  
43 addressed insufficiently in existing reviews on the management of obesity in older adults. In  
44 addition, methodological issues prevent the drawing of firm conclusions, e.g.  
45 recommendations for obesity treatment. These include too specific searches in only one  
46 database, not covering the complete time period of databases and application of language  
47 restrictions. This must be considered insufficient as it likely missed relevant evidence.<sup>55 56</sup>  
48 Further, a quality rating of the included RCTs was missing in the majority of these systematic  
49 reviews or when done, some used no standardised tools. The only published meta-analysis  
50 dates back to 2010,<sup>53</sup> and there is no meta-analysis available for functional outcomes in older  
51  
52  
53  
54  
55  
56  
57  
58  
59  
60



1  
2  
3 people with obesity. Considering, recently published intervention studies, e.g. Ard et al.  
4 (2018)<sup>57</sup> and Beavers et al. (2019),<sup>58</sup> it is likely that accumulated evidence enables quantitative  
5 syntheses.  
6  
7

8  
9 These limitations of existing systematic reviews highlight an evidence gap and justify the need  
10 for a thoroughly conducted high-quality systematic review according to the updated  
11 standards described by the Cochrane Collaboration for network meta-analysis.<sup>59 60</sup> As older  
12 adults are particularly susceptible to negative effects of excess body mass on physical function  
13 due to the age-related decline in muscle mass and strength<sup>14</sup> and frequently report the priority  
14 of functional outcomes related to mobility and daily life tasks,<sup>61</sup> these outcomes should be  
15 investigated comprehensively.  
16  
17

18 An important question remaining is which type of lifestyle intervention or treatment modality  
19 offers optimal benefits in older adults with obesity. As there exists a large number of possible  
20 interventions, multiple pairwise meta-analyses are insufficient to provide an answer of high  
21 certainty. Therefore, we will conduct a comprehensive systematic review with network meta-  
22 analyses (NMA) of RCTs to synthesize the evidence regarding the beneficial and potentially  
23 harmful effects of different types and modalities of lifestyle interventions, or their  
24 combinations, on physical function and obesity-related outcomes such as body composition  
25 in older adults with obesity.  
26  
27

## 28 **Methods and analysis**

### 29 ***Reporting***

30 We report this protocol according to the PRISMA-statement for systematic review protocols  
31 (PRISMA-P, (see Table 1)),<sup>62</sup> the additional guidance for NMA by Chaimani et al<sup>63</sup> and the  
32 guidance for systematic reviews of older adults by Shenkin et al<sup>64</sup> to ensure thorough  
33 reporting and implementation. The methodology is preregistered on the International  
34 Prospective Register of Systematic Reviews (PROSPERO) (registration number  
35 CRD42019147286).<sup>65</sup>  
36  
37

### 38 ***Eligibility criteria***

39 We will select primary studies according to the criteria below.  
40  
41

#### 42 ***Population***

43 To focus this systematic review on older adults, we will include studies including adults with a  
44 minimum age of 60 years and a mean of  $\geq 65$  years.<sup>66</sup> Obesity will be defined using total fat  
45  
46  
47  
48  
49  
50  
51  
52  
53  
54  
55  
56  
57  
58  
59  
60

1  
2  
3 mass  $\geq 35\%$  and  $\geq 25\%$ <sup>67</sup> and waist circumference of  $\geq 88\text{cm}$  and  $\geq 102\text{cm}$  for women and men,<sup>68</sup>  
4  
5 respectively. Because of its use clinically, we will also consider BMI, applying the standard  
6  
7 adult cut-off of  $\geq 30\text{kg/m}^2$  since there is no consensus on age-adjusted cut-offs.<sup>69</sup> For all three  
8  
9 operationalizations, the methods of measurement applied by individual studies will be used.  
10  
11 When studies report mixed samples of older adults with overweight and obesity, we will  
12  
13 contact the authors to request the data for the subgroup with obesity. If the provision of data  
14  
15 is not possible, the study will be excluded. No consensus definition of sarcopenic obesity exists  
16  
17 and various operationalisations are in use.<sup>9</sup> As such, the definition applied by the primary  
18  
19 study will be used, and we shall acknowledge differences in potential sub-group or sensitivity  
20  
21 analyses, if possible. Due to the high prevalence of multimorbidity in older people and existing  
22  
23 obesity-related co-morbidities, participants with common comorbidities of obesity (e.g.  
24  
25 diabetes, cardiovascular, metabolic syndrome, chronic kidney disease, osteoarthritis and  
26  
27 geriatric syndromes (e.g. frailty and sarcopenia)) will be included. We will only include studies  
28  
29 comprising community-dwelling older adults, due to the predictive value of obesity for nursing  
30  
31 home admissions.<sup>70</sup> Studies focusing on animals, genetics or biochemistry will be excluded.  
32  
33 References that have not been included after full-text screening will be listed in a table with  
34  
35 the respective reason(s) for exclusion.

### 35 *Interventions*

36  
37 We will include any type of lifestyle intervention, e.g. diet, exercise, behavioural, as well as all  
38  
39 treatment modalities and their combinations with all types of deliveries and doses. For the  
40  
41 dietary component, interventions such as energy restriction, balanced (healthy) diet (e.g. food  
42  
43 pyramid), Mediterranean diet, high-protein diet, low-fat diet, moderate-carbohydrate diet,  
44  
45 low-carbohydrate diet, low glycaemic index/glycaemic load diet, vegetarian diet, DASH-diet  
46  
47 will be considered. Interventions providing only micronutrient supplements (e.g. Vitamin D)  
48  
49 as well as studies using only very low energy diets ( $< 800\text{ kcal/day}$ ) or total diet replacement  
50  
51 will be excluded.<sup>71</sup> The exercise component will be defined as any planned, structured, and  
52  
53 repetitive movement with the objective to improve or maintain physical fitness, e.g. aerobic,  
54  
55 resistance, balance training, according to the definition of the American College of Sports  
56  
57 Medicine.<sup>72</sup> We will also consider physically supported methods, such as electrical muscle  
58  
59 stimulation and vibration training when combined with gross movements or done in an  
60  
61 upright position. Finally, as recommended in obesity guidelines, behavioural strategies such  
62  
63 as motivational interviewing, goal setting, self-management, stress management, social

1  
2  
3 support, training of self-efficacy and relapse management that support lifestyle changes will  
4 be considered.  
5

### 6 7 *Comparators*

8  
9 Since NMA will be conducted, all interventions will be compared to each other. Additionally,  
10 control groups, such as usual care or health counselling, will be considered as comparators.  
11

### 12 13 *Outcomes*

14  
15 Only previously validated outcomes will be considered and need to be measured at least pre-  
16 and post-intervention.  
17

#### 18 19 *Main Outcome*

20  
21 The change in **functional status** with focus on physical function was shown to be important to  
22 health and adverse outcomes<sup>18 19</sup> and patient-relevant<sup>61</sup> and will therefore be our main  
23 outcome. This includes standard measures of strength, mobility and functional performance  
24 for independence in daily living, including their modifications. Common measurements  
25 include but are not limited to one-leg stance (balance), gait speed (gait, mobility), 6-min-walk  
26 test (endurance), repeated chair stands (functional strength, lower extremity function), grip  
27 strength (strength, overall function), leg power as well as composite scores of functional tests  
28 such as the Short-Physical-Performance-Battery (SPPB)<sup>19</sup> or the Physical Performance Test  
29 (PPT).<sup>73</sup> Patient-reported outcomes of functional status (e.g. Late-Life Function and Disability  
30 Instrument (LLFDI)) and digital measurements (e.g. instrumented gait analysis) will also be  
31 considered.  
32  
33  
34  
35  
36  
37  
38  
39

#### 40 41 *Other outcomes*

42  
43 To evaluate changes in **weight and body composition**, we will consider measures such as total  
44 body mass, fat mass (e.g. total, central, peripheral), lean mass, muscle mass (e.g. total,  
45 appendicular, lower extremity skeletal), bone mineral density (e.g. hip, lumbar spine, whole  
46 body).  
47  
48

49  
50 **(Health-related) quality of life** will be summarised when reported by standardized  
51 instruments such as 36-Item Short Form Survey (SF-36)<sup>74</sup> or EuroQol-5D (EQ-5D).<sup>75</sup> If reported  
52 in primary studies, **emotional status** (e.g. depressive symptoms, depression), **social**  
53 **participation** (e.g. informal social relationships, community life) and satisfaction with  
54 intervention will also be captured.  
55  
56  
57  
58  
59  
60

1  
2  
3 We will summarise **any reported adverse event (AE)** (e.g. hypoglycaemia, hypotension, falls,  
4 cardiovascular events, institutionalization and mortality), related to the intervention as well  
5 as an outcome measure of safety or efficacy.  
6  
7

### 8 9 *Design of primary studies*

10 We will include (quasi-) RCTs (parallel and cross-over). Due to a lower level of initial fitness,  
11 prevalent health restrictions and the time needed to respond to treatment, we will include  
12 studies with intervention durations of  $\geq 12$  weeks.<sup>40</sup>  
13  
14

15 We will not set any restrictions regarding language or time frame. We will involve colleagues  
16 who are fluent in the respective languages or use online translators (e. g.  
17 <https://www.deepl.com/home>).  
18  
19

20  
21  
22 Conference abstracts will be excluded.  
23

### 24 25 **Search strategy**

26 Six electronic databases (Medline, Embase, Cochrane Central, CINAHL, PsychInfo and Web of  
27 Science) for published trials and two trial registries (Clinicaltrials.gov, WHO International  
28 Clinical Trials Registry Platform) for unpublished or ongoing trials will be searched. We  
29 developed the search strategy for Medline (via Ovid) (see Table 2) using a search block for  
30 people aged  $\geq 65$  years and adapted a block for interventions from a recently published  
31 Cochrane review evaluating lifestyle interventions in paediatric patients with overweight and  
32 obesity, which was reviewed and revised by information specialists.<sup>76</sup> For other databases, the  
33 search strategy will be adapted according to the database-specific requirements. Additionally,  
34 we will screen reference lists of published SRs and eligible RCTs for potential consideration of  
35 further primary RCTs and will contact the advisory board which consists of clinical and  
36 scientific experts to enquire whether all relevant studies were identified.  
37  
38  
39  
40  
41  
42  
43  
44  
45  
46

### 47 48 **Selection process**

49 Identified references will be saved in Endnote and after excluding duplicates, references will  
50 be uploaded to Covidence (<http://www.covidence.org>). Two reviewers (GT, DS) will  
51 independently screen titles/abstracts and full-texts for eligibility according to the criteria  
52 described above. The title/abstract screening will be piloted using the first 200 references and  
53 in case of too many deviations ( $>10\%$ ), it will be revised. Disagreements will be solved by  
54 discussion or if no consensus can be reached by a third reviewer who will be asked based on  
55  
56  
57  
58  
59  
60

1  
2  
3 his/her expertise (nutrition/general (EK), exercise (WK), behaviour (NSB)). If relevant  
4 information is lacking, we will contact the corresponding author/s twice at a weekly interval.  
5  
6

### 7 **Data extraction**

8  
9 Two reviewers (GT, DS) will extract data of included references independently using a piloted  
10 data extraction table. In case of no consensus, a third reviewer (based on expertise) will solve  
11 disagreements. If relevant data is missing, we will contact the corresponding author/s twice  
12 at weekly intervals.  
13  
14

15  
16 When extracting the data, we will consider the following information:

17  
18 **study characteristics:** e.g. author, publication year, eligibility criteria, setting, study duration,  
19 sample size, follow-up time, conflict of interest;  
20

21  
22 **participants' characteristics:** e.g. age, sex, ethnicity, BMI, body composition (e.g. fat mass,  
23 muscle mass, height/weight adjusted indices), comorbidities (e.g. diabetes, cardiovascular  
24 disease), geriatric syndromes (e.g. sarcopenia, frailty, cognitive impairment), functional  
25 status, lifestyle behaviour (e.g. sedentary);  
26  
27

28  
29 **intervention characteristics:** type and modality, type of delivery, dose (e.g. duration,  
30 frequency, intensity), control arms, co-interventions, compliance and adherence, drop out,  
31 (serious) adverse events related to intervention;  
32  
33

34  
35 **outcomes:** baseline values and follow-up values of functional status, BMI, weight, body  
36 composition (lean mass, fat mass), quality of life, emotional status, social participation and  
37 any reported AE as reported by study authors.  
38  
39

### 40 **Assessment of risk of bias**

41  
42 The risk of bias will be assessed after a pilot trial (n=3) by two reviewers (GT, DS; not blinded  
43 to authors and journal of primary studies) independently using the revised Cochrane risk of  
44 bias tool (RoB 2.0) for RCTs.<sup>77 78</sup> According to this, sources of bias will be identified by  
45 assessing: i) the randomization process, ii) deviations from intended interventions, iii) missing  
46 outcome data, iv) measurement of the outcome and v) selection of the reported result. For  
47 each domain, available algorithms will be followed to answer the signalling questions  
48 (response options: yes, probably yes, probably no, no, or no information) and to judge the risk  
49 of bias as low, some concerns, or high. The overall risk of bias will also be rated as low (if low  
50 risk of bias in all domains), some concerns (at least one domain is rated as having some  
51 concerns but no domain is rated by a high risk of bias), or high (if at least one domain is judged  
52  
53  
54  
55  
56  
57  
58  
59  
60

with a high risk of bias or multiple domains are rated as having some concerns which might impact the confidence in a result). We will present results in a risk of bias summary graph.

### ***Assessment of certainty of evidence***

Grading of Recommendations, Assessment, Development and Evaluation (GRADE) approach for NMA will be used to assess the certainty of evidence.<sup>79-81</sup> In addition to the risk of bias rating for every outcome, this includes the rating of direct and indirect evidence for inconsistency, indirectness and dissemination bias. In case of high certainty and a similar contribution of direct and indirect evidence to the network estimate, the highest rating will be used but could be further down-rated for incoherence and imprecision. In case of insufficient evidence as well as moderate, low or very low certainty, the indirect estimate will be rated by the lowest of two direct comparisons included in first-order loops and could be further down-rated for intransitivity. Dissemination bias will be investigated by searching for unpublished trials (see section search strategies). 'Summary of Findings' tables adapted for NMA results will be presented, similar to the proposal by Yepes-Nuñez et al.<sup>82</sup>

### ***Statistical analyses***

#### ***Measures of treatment effect***

Effect sizes for continuous outcomes (e.g. weight loss, muscle strength) will be expressed as mean difference (MD) or standardised mean difference (SMD) with 95% confidence intervals (95%-CI). For dichotomous outcomes (e.g. AE), effect sizes will be expressed as risk ratios (RR) with 95%-CI.<sup>83</sup> In exceptional cases (i.e. if a minor number of RCTs expressed an AE continuously while the majority used dichotomous outcomes), the outcomes reported as continuous or categorical will be dichotomized.<sup>84</sup> If the post-intervention values with the corresponding standard deviation (SD) are not available, the changed scores with the corresponding SD will be used.<sup>85</sup>

#### ***Data synthesis***

We will conduct random effects model network meta-analyses (NMA) based on a frequentist approach to derive pooled estimates for all outcomes.<sup>86</sup> We will use the R package 'netmeta'.<sup>87</sup> In NMA, evidence from direct comparisons and indirect comparisons is averaged to calculate a network estimate. The key requirement for conducting NMA is that the transitivity assumption - to compare two interventions via an indirect route in the network - is ensured. We assume that for our planned analyses, all interventions are jointly randomisable<sup>63 88</sup> and that all participants are likely to receive any kind of included

1  
2  
3 interventions. Network graphs will be generated by function *netgraph()* of netmeta.<sup>87 89</sup> We  
4 will assess global incoherence by decomposing the Q statistic into heterogeneity (within  
5 designs) and inconsistency (between designs) and visualise this using a net-heat plot.<sup>90</sup> In  
6 addition, We will report and assess inconsistency by calculating differences between direct  
7 and indirect effect estimates using descriptive z-tests (function *netsplit()*) and report the  
8 distribution of direct and indirect evidence. The treatment modalities (e.g. very low caloric  
9 diet, aerobic exercise, their combination or no intervention (e.g. health counselling, healthy  
10 eating/ exercise advise)) will build the nodes of the network providing maximizing similarity  
11 within and minimizing similarity between the nodes.<sup>79</sup> Additionally, we will analyse the  
12 components (e.g. of combined interventions using an additive model for multicomponent  
13 interventions.<sup>91</sup> Models of this type allow disentangling the effects of all single components  
14 (e.g. very low caloric diet (A), aerobic exercise (B), behavioural group counselling (C)) of a  
15 multicomponent intervention arm consisting of at least two single components (e.g. A+B, A+C,  
16 B+C or A+B+C). Since we do not believe that lifestyle interventions that are available for  
17 treatment of obesity may fulfil the additivity assumption for component NMA (CNMA) – i.e.  
18 the effect of a multicomponent intervention equals the sum of their components without any  
19 interactions – we will use the interaction CNMA model which is implemented in the function  
20 *netcomb()* of netmeta.<sup>87 91</sup> In the case of disconnected networks, we will reconnect the  
21 networks if possible (i.e. presence of at least one common component in the subnetworks).  
22 This feature of CNMA is also implemented in netmeta (function *discomb()*).  
23  
24  
25  
26  
27  
28  
29  
30  
31  
32  
33  
34  
35  
36  
37  
38  
39

40 A secondary data analysis will be conducted using intervention types as network nodes (e.g.  
41 diet, exercise, behavioural). Results of NMA will be presented as forest plots. We will present  
42 league tables containing relative treatment effects for all direct comparisons (function  
43 *netleague()*) and a ranking of all treatments by P-scores.<sup>92</sup>  
44  
45  
46

#### 47 *Sensitivity and subgroup analyses*

48  
49 If possible, sensitivity analyses will be conducted by only including studies rated as low risk of  
50 bias. We will try to conduct subgroup analyses for type of obesity (sarcopenic obesity vs  
51 obesity), intervention duration (</> 6 months), age (</> 75 years), sex, BMI-group (</> 35  
52 kg/m<sup>2</sup>) and co-morbidities.  
53  
54  
55  
56

#### 57 **Patient and public involvement**

58  
59 Before the start of this project, we have conducted and are currently analysing a qualitative  
60 study with semi-structured interviews in older persons with obesity. The aim is to obtain

1  
2  
3 further information on patients' motives, barriers, experiences and perceptions regarding  
4 therapeutic lifestyle interventions and thus, potentially identify evidence gaps. The results will  
5 be published in a separate manuscript.  
6  
7

8 In addition, we discuss patient-relevant outcomes, existing obstacles that exacerbate the  
9 process of contacting this population of patients as well as potential dissemination strategies  
10 with representatives of German patient advocate groups.  
11  
12  
13

### 14 **Ethics and dissemination**

15 For NMA, there is no direct data collection from human participants and hence, no ethical  
16 approval is necessary.  
17  
18

19 We will submit our research articles to peer-reviewed journals and will present our results at  
20 national and international conferences. Involved experts will disseminate the results in  
21 scientific and medical societies. We will further disseminate our project via partner  
22 universities' websites and press releases. Patient-targeted dissemination will involve local and  
23 national advocate groups and offices for senior affairs. In addition, we will disseminate the  
24 results by distribution of materials in plain language.  
25  
26  
27  
28  
29  
30  
31  
32  
33

### 34 **Full references**

- 35 1. WHO. Obesity and overweight. Available from: <https://www.who.int/news-room/fact-sheets/detail/obesity-and-overweight> accessed 03.03.2020.
- 36 2. GBD 2015 Obesity Collaborators, Afshin A, Forouzanfar MH, et al. Health Effects of  
37 Overweight and Obesity in 195 Countries over 25 Years. *N Engl J Med* 2017;377(1):13-  
38 27. doi: 10.1056/NEJMoa1614362 [published Online First: 2017/06/12]
- 39 3. He W, Goodkind D, Kowal P. U.S. Census Bureau, International Population Reports, P95/16-  
40 1, An Aging World: 2015, U.S. Government Publishing Office, Washington, DC, 2016.
- 41 4. Hales CM, Fryar CD, Carroll MD, et al. Trends in Obesity and Severe Obesity Prevalence in  
42 US Youth and Adults by Sex and Age, 2007-2008 to 2015-2016. *JAMA*  
43 2018;319(16):1723-25. doi: 10.1001/jama.2018.3060
- 44 5. Batsis JA, Mackenzie TA, Bartels SJ, et al. Diagnostic accuracy of body mass index to identify  
45 obesity in older adults: NHANES 1999-2004. *Int J Obes (Lond)* 2016;40(5):761-67. doi:  
46 10.1038/ijo.2015.243 [published Online First: 2015/12/01]
- 47 6. Germain CM, Vasquez E, Batsis JA. Physical Activity, Central Adiposity, and Functional  
48 Limitations in Community-Dwelling Older Adults. *J Geriatr Phys Ther* 2016;39(2):71-76.  
49 doi: 10.1519/JPT.0000000000000051
- 50 7. Kemmler W, Teschler M, Weißenfels A, et al. Prevalence of sarcopenia and sarcopenic  
51 obesity in older German men using recognized definitions: high accordance but low  
52 overlap! *Osteoporos Int* 2017;28(6):1881-91. doi: 10.1007/s00198-017-3964-9  
53 [published Online First: 2017/02/20]
- 54 8. Kemmler W, von Stengel S, Engelke K, et al. Prevalence of sarcopenic obesity in Germany  
55 using established definitions: Baseline data of the FORMOsA study. *Osteoporos Int*  
56  
57  
58  
59  
60



- 2016;27(1):275-81. doi: 10.1007/s00198-015-3303-y [published Online First: 2015/08/29]
9. Batsis JA, Barre LK, Mackenzie TA, et al. Variation in the prevalence of sarcopenia and sarcopenic obesity in older adults associated with different research definitions: dual-energy X-ray absorptiometry data from the National Health and Nutrition Examination Survey 1999-2004. *J Am Geriatr Soc* 2013;61(6):974-80. doi: 10.1111/jgs.12260 [published Online First: 2013/05/06]
  10. Atkins JL, Whincup PH, Morris RW, et al. Sarcopenic obesity and risk of cardiovascular disease and mortality: a population-based cohort study of older men. *J Am Geriatr Soc* 2014;62(2):253-60. doi: 10.1111/jgs.12652 [published Online First: 2014/01/15]
  11. Global BMI Mortality Collaboration, Di Angelantonio E, Bhupathiraju S, et al. Body-mass index and all-cause mortality: individual-participant-data meta-analysis of 239 prospective studies in four continents. *Lancet* 2016;388(10046):776-86. doi: 10.1016/S0140-6736(16)30175-1 [published Online First: 2016/07/13]
  12. Laxy M, Teuner C, Holle R, et al. The association between BMI and health-related quality of life in the US population: sex, age and ethnicity matters. *Int J Obes (Lond)* 2018;42(3):318-26. doi: 10.1038/ijo.2017.252 [published Online First: 2017/10/10]
  13. Cho Y, Shin S-Y, Shin M-J. Sarcopenic obesity is associated with lower indicators of psychological health and quality of life in Koreans. *Nutr Res* 2015;35(5):384-92. doi: 10.1016/j.nutres.2015.04.002 [published Online First: 2015/04/10]
  14. Villareal DT, Apovian CM, Kushner RF, et al. Obesity in older adults: technical review and position statement of the American Society for Nutrition and NAASO, The Obesity Society. *Obes Res* 2005;13(11):1849-63. doi: 10.1038/oby.2005.228
  15. Silverwood V, Blagojevic-Bucknall M, Jinks C, et al. Current evidence on risk factors for knee osteoarthritis in older adults: a systematic review and meta-analysis. *Osteoarthritis Cartilage* 2015;23(4):507-15. doi: 10.1016/j.joca.2014.11.019 [published Online First: 2014/11/29]
  16. Cross M, Smith E, Hoy D, et al. The global burden of hip and knee osteoarthritis: estimates from the global burden of disease 2010 study. *Ann Rheum Dis* 2014;73(7):1323-30. doi: 10.1136/annrheumdis-2013-204763 [published Online First: 2014/02/19]
  17. Schaap LA, Koster A, Visser M. Adiposity, muscle mass, and muscle strength in relation to functional decline in older persons. *Epidemiol Rev* 2013;35:51-65. doi: 10.1093/epirev/mxs006 [published Online First: 2012/12/04]
  18. Guralnik JM, Ferrucci L, Pieper CF, et al. Lower extremity function and subsequent disability: consistency across studies, predictive models, and value of gait speed alone compared with the short physical performance battery. *J Gerontol A Biol Sci Med Sci* 2000;55(4):M221-M31. doi: 10.1093/gerona/55.4.m221
  19. Guralnik JM, Simonsick EM, Ferrucci L, et al. A short physical performance battery assessing lower extremity function: association with self-reported disability and prediction of mortality and nursing home admission. *J Gerontol* 1994;49(2):M85-M94. doi: 10.1093/geronj/49.2.m85
  20. Baumgartner RN, Wayne SJ, Waters DL, et al. Sarcopenic obesity predicts instrumental activities of daily living disability in the elderly. *Obes Res* 2004;12(12):1995-2004. doi: 10.1038/oby.2004.250
  21. Rolland Y, Lauwers-Cances V, Cristini C, et al. Difficulties with physical function associated with obesity, sarcopenia, and sarcopenic-obesity in community-dwelling elderly women: the EPIDOS (EPIDemiologie de l'OSteoporose) Study. *Am J Clin Nutr*

- 2009;89(6):1895-900. doi: 10.3945/ajcn.2008.26950 [published Online First: 2009/04/15]
22. Himes CL, Reynolds SL. Effect of obesity on falls, injury, and disability. *J Am Geriatr Soc* 2012;60(1):124-29. doi: 10.1111/j.1532-5415.2011.03767.x [published Online First: 2011/12/08]
23. Scott D, Chandrasekara SD, Laslett LL, et al. Associations of Sarcopenic Obesity and Dynapenic Obesity with Bone Mineral Density and Incident Fractures Over 5-10 Years in Community-Dwelling Older Adults. *Calcif Tissue Int* 2016;99(1):30-42. doi: 10.1007/s00223-016-0123-9 [published Online First: 2016/03/04]
24. Follis S, Cook A, Bea JW, et al. Association Between Sarcopenic Obesity and Falls in a Multiethnic Cohort of Postmenopausal Women. *J Am Geriatr Soc* 2018;66(12):2314-20. doi: 10.1111/jgs.15613 [published Online First: 2018/10/30]
25. Scott D, Seibel M, Cumming R, et al. Sarcopenic Obesity and Its Temporal Associations With Changes in Bone Mineral Density, Incident Falls, and Fractures in Older Men: The Concord Health and Ageing in Men Project. *J Bone Miner Res* 2017;32(3):575-83. doi: 10.1002/jbmr.3016 [published Online First: 2016/11/03]
26. Zizza CA, Herring A, Stevens J, et al. Obesity affects nursing-care facility admission among whites but not blacks. *Obes Res* 2002;10(8):816-23. doi: 10.1038/oby.2002.110
27. Alley DE, Ferrucci L, Barbagallo M, et al. A research agenda: the changing relationship between body weight and health in aging. *J Gerontol A Biol Sci Med Sci* 2008;63(11):1257-59. doi: 10.1093/gerona/63.11.1257
28. Fried LP, Tangen CM, Walston J, et al. Frailty in older adults: evidence for a phenotype. *J Gerontol A Biol Sci Med Sci* 2001;56(3):M146-M56. doi: 10.1093/gerona/56.3.m146
29. Rockwood K, Stadnyk K, MacKnight C, et al. A brief clinical instrument to classify frailty in elderly people. *Lancet* 1999;353(9148):205-06. doi: 10.1016/S0140-6736(98)04402-X
30. Kent S, Fusco F, Gray A, et al. Body mass index and healthcare costs: a systematic literature review of individual participant data studies. *Obes Rev* 2017;18(8):869-79. doi: 10.1111/obr.12560 [published Online First: 2017/05/22]
31. Calculating the costs of the consequences of obesity 2017. Available from: <https://www.worldobesity.org/resources/resource-library/calculating-the-costs-of-the-consequences-of-obesity> accessed 19.02.2020.
32. Alfadda AA, Al-Dhwayan MM, Alharbi AA, et al. The Saudi clinical practice guideline for the management of overweight and obesity in adults. *Saudi Med J* 2016;37(10):1151-62. doi: 10.15537/smj.2016.10.14353
33. Hauner H, Moss A, Berg A, et al. Interdisziplinäre Leitlinie der Qualität S3 zur „Prävention und Therapie der Adipositas“. *Adipositas-Ursachen, Folgeerkrankungen, Therapie* 2014;8(04):179-221.
34. Kushner RF, Ryan DH. Assessment and lifestyle management of patients with obesity: clinical recommendations from systematic reviews. *JAMA* 2014;312(9):943-52. doi: 10.1001/jama.2014.10432
35. Cetin DC, Nasr G. Obesity in the elderly: more complicated than you think. *Cleve Clin J Med* 2014;81(1):51-61. doi: 10.3949/ccjm.81a.12165
36. Weinheimer EM, Sands LP, Campbell WW. A systematic review of the separate and combined effects of energy restriction and exercise on fat-free mass in middle-aged and older adults: implications for sarcopenic obesity. *Nutr Rev* 2010;68(7):375-88. doi: 10.1111/j.1753-4887.2010.00298.x
37. Soltani S, Hunter GR, Kazemi A, et al. The effects of weight loss approaches on bone mineral density in adults: a systematic review and meta-analysis of randomized

- 1  
2  
3 controlled trials. *Osteoporos Int* 2016;27(9):2655-71. doi: 10.1007/s00198-016-3617-  
4 4 [published Online First: 2016/05/06]
- 5  
6 38. Mathus-Vliegen EMH, Obesity Management Task Force of the European Association for  
7 the Study of O. Prevalence, pathophysiology, health consequences and treatment  
8 options of obesity in the elderly: a guideline. *Obes Facts* 2012;5(3):460-83. doi:  
9 10.1159/000341193 [published Online First: 2012/06/30]
- 10  
11 39. Volkert D, Beck AM, Cederholm T, et al. ESPEN guideline on clinical nutrition and hydration  
12 in geriatrics. *Clin Nutr* 2019;38(1):10-47. doi: 10.1016/j.clnu.2018.05.024 [published  
13 Online First: 2018/06/18]
- 14  
15 40. Brawley LR, Rejeski WJ, King AC. Promoting physical activity for older adults: the challenges  
16 for changing behavior. *Am J Prev Med* 2003;25(3 Suppl 2):172-83. doi: 10.1016/s0749-  
17 3797(03)00182-x
- 18  
19 41. American College of Cardiology/American Heart Association Task Force on Practice  
20 Guidelines OEP. Expert Panel Report: Guidelines (2013) for the management of  
21 overweight and obesity in adults. *Obesity (Silver Spring)* 2014;22 Suppl 2:S41-S410. doi:  
22 10.1002/oby.20660
- 23  
24 42. Jensen MD, Ryan DH, Apovian CM, et al. 2013 AHA/ACC/TOS guideline for the  
25 management of overweight and obesity in adults: a report of the American College of  
26 Cardiology/American Heart Association Task Force on Practice Guidelines and The  
27 Obesity Society. *Circulation* 2014;129(25 Suppl 2):S102-S38. doi:  
28 10.1161/01.cir.0000437739.71477.ee [published Online First: 2013/11/12]
- 29  
30 43. Bales CW, Buhr G. Is obesity bad for older persons? A systematic review of the pros and  
31 cons of weight reduction in later life. *J Am Med Dir Assoc* 2008;9(5):302-12. doi:  
32 10.1016/j.jamda.2008.01.006
- 33  
34 44. Batsis JA, Gill LE, Masutani RK, et al. Weight Loss Interventions in Older Adults with  
35 Obesity: A Systematic Review of Randomized Controlled Trials Since 2005. *J Am Geriatr*  
36 *Soc* 2017;65(2):257-68. doi: 10.1111/jgs.14514 [published Online First: 2016/09/19]
- 37  
38 45. Bouaziz W, Schmitt E, Kaltenbach G, et al. Health benefits of endurance training alone or  
39 combined with diet for obese patients over 60: a review. *Int J Clin Pract*  
40 2015;69(10):1032-49. doi: 10.1111/ijcp.12648 [published Online First: 2015/05/11]
- 41  
42 46. Felix HC, West DS. Effectiveness of weight loss interventions for obese older adults. *Am J*  
43 *Health Promot* 2013;27(3):191-99. doi: 10.4278/ajhp.110617-LIT-259
- 44  
45 47. Haywood C, Sumithran P. Treatment of obesity in older persons-A systematic review. *Obes*  
46 *Rev* 2019;20(4):588-98. doi: 10.1111/obr.12815 [published Online First: 2019/01/15]
- 47  
48 48. McTigue KM, Hess R, Ziouras J. Obesity in older adults: a systematic review of the evidence  
49 for diagnosis and treatment. *Obesity (Silver Spring)* 2006;14(9):1485-97. doi:  
50 10.1038/oby.2006.171
- 51  
52 49. Poggiogalle E, Migliaccio S, Lenzi A, et al. Treatment of body composition changes in obese  
53 and overweight older adults: insight into the phenotype of sarcopenic obesity.  
54 *Endocrine* 2014;47(3):699-716. doi: 10.1007/s12020-014-0315-x [published Online  
55 First: 2014/06/22]
- 56  
57 50. Porter Starr KN, McDonald SR, Bales CW. Obesity and physical frailty in older adults: a  
58 scoping review of lifestyle intervention trials. *J Am Med Dir Assoc* 2014;15(4):240-50.  
59 doi: 10.1016/j.jamda.2013.11.008 [published Online First: 2014/01/17]
- 60  
61 51. Rejeski WJ, Marsh AP, Chmelo E, et al. Obesity, intentional weight loss and physical  
62 disability in older adults. *Obes Rev* 2010;11(9):671-85. doi: 10.1111/j.1467-  
63 789X.2009.00679.x

- 1
  - 2
  - 3
  - 4
  - 5
  - 6
  - 7
  - 8
  - 9
  - 10
  - 11
  - 12
  - 13
  - 14
  - 15
  - 16
  - 17
  - 18
  - 19
  - 20
  - 21
  - 22
  - 23
  - 24
  - 25
  - 26
  - 27
  - 28
  - 29
  - 30
  - 31
  - 32
  - 33
  - 34
  - 35
  - 36
  - 37
  - 38
  - 39
  - 40
  - 41
  - 42
  - 43
  - 44
  - 45
  - 46
  - 47
  - 48
  - 49
  - 50
  - 51
  - 52
  - 53
  - 54
  - 55
  - 56
  - 57
  - 58
  - 59
  - 60
52. Waters DL, Ward AL, Villareal DT. Weight loss in obese adults 65years and older: a review of the controversy. *Exp Gerontol* 2013;48(10):1054-61. doi: 10.1016/j.exger.2013.02.005 [published Online First: 2013/02/10]
53. Witham MD, Avenell A. Interventions to achieve long-term weight loss in obese older people: a systematic review and meta-analysis. *Age Ageing* 2010;39(2):176-84. doi: 10.1093/ageing/afp251 [published Online First: 2010/01/18]
54. Greaves C, Poltawski L, Garside R, et al. Understanding the challenge of weight loss maintenance: a systematic review and synthesis of qualitative research on weight loss maintenance. *Health Psychol Rev* 2017;11(2):145-63. doi: 10.1080/17437199.2017.1299583 [published Online First: 2017/04/07]
55. Catalogue of Bias Collaboration, Brassey J, Spencer EA, Heneghan C. Language bias. In: Catalogue Of Bias 2017. Available from: <https://catalogofbias.org/biases/language-bias/> accessed 19.02.2020.
56. Puljak L. If there is only one author or only one database was searched, a study should not be called a systematic review. *J Clin Epidemiol* 2017;91:4-5. doi: 10.1016/j.jclinepi.2017.08.002 [published Online First: 2017/08/18]
57. Ard JD, Gower B, Hunter G, et al. Effects of Calorie Restriction in Obese Older Adults: The CROSSROADS Randomized Controlled Trial. *J Gerontol A Biol Sci Med Sci* 2017;73(1):73-80. doi: 10.1093/gerona/glw237
58. Beavers KM, Nesbit BA, Kiel JR, et al. Effect of an Energy-Restricted, Nutritionally Complete, Higher Protein Meal Plan on Body Composition and Mobility in Older Adults With Obesity: A Randomized Controlled Trial. *J Gerontol A Biol Sci Med Sci* 2019;74(6):929-35. doi: 10.1093/gerona/gly146
59. Cumpston M, Li T, Page MJ, et al. Updated guidance for trusted systematic reviews: a new edition of the Cochrane Handbook for Systematic Reviews of Interventions. *Cochrane Database Syst Rev* 2019;10:ED000142-ED42. doi: 10.1002/14651858.ED000142
60. Higgins JPT TJ, Chandler J, Cumpston M, Li T, Page MJ, Welch VA. (editors). *Cochrane Handbook for Systematic Reviews of Interventions*. 2nd Edition: Chichester (UK): John Wiley & Sons 2019.
61. Jackson SE, Holter L, Beeken RJ. 'Just because I'm old it doesn't mean I have to be fat': a qualitative study exploring older adults' views and experiences of weight management. *BMJ Open* 2019;9(2):e025680-e80. doi: 10.1136/bmjopen-2018-025680
62. Moher D, Shamseer L, Clarke M, et al. Preferred reporting items for systematic review and meta-analysis protocols (PRISMA-P) 2015 statement. *Syst Rev* 2015;4(1):1-1. doi: 10.1186/2046-4053-4-1
63. Chaimani A, Caldwell DM, Li T, et al. Additional considerations are required when preparing a protocol for a systematic review with multiple interventions. *J Clin Epidemiol* 2017;83:65-74. doi: 10.1016/j.jclinepi.2016.11.015 [published Online First: 2017/01/11]
64. Shenkin SD, Harrison JK, Wilkinson T, et al. Systematic reviews: guidance relevant for studies of older people. *Age Ageing* 2017;46(5):722-28. doi: 10.1093/ageing/afx105
65. Torbahn G, Schoene D, Schwingshackl L, et al. EffectiveSLOPE: EffectS of Lifestyle interventions in Obese older PEople – a systematic review and network meta-analysis. PROSPERO 2019 CRD42019147286 2019. Available from: [https://www.crd.york.ac.uk/prospero/display\\_record.php?ID=CRD42019147286](https://www.crd.york.ac.uk/prospero/display_record.php?ID=CRD42019147286) accessed 19.02.2020.

- 1  
2  
3 66. NHS England. Improving care for older people. Available from:  
4 [https://www.england.nhs.uk/ourwork/clinical-policy/older-people/improving-care-](https://www.england.nhs.uk/ourwork/clinical-policy/older-people/improving-care-for-older-people/)  
5 [for-older-people/](https://www.england.nhs.uk/ourwork/clinical-policy/older-people/improving-care-for-older-people/) accessed 20.02.2020.  
6  
7 67. World Health Organisation. Physical Status: The use and interpretation of anthropometry.  
8 Technical Report Series 854, Geneva, 1995.  
9  
10 68. Han TS, van Leer EM, Seidell JC, et al. Waist circumference action levels in the identification  
11 of cardiovascular risk factors: prevalence study in a random sample. *BMJ*  
12 1995;311(7017):1401-05. doi: 10.1136/bmj.311.7017.1401  
13  
14 69. Batsis JA, Zagaria AB. Addressing Obesity in Aging Patients. *Med Clin North Am*  
15 2018;102(1):65-85. doi: 10.1016/j.mcna.2017.08.007 [published Online First:  
16 2017/10/21]  
17  
18 70. Valiyeva E, Russell LB, Miller JE, et al. Lifestyle-related risk factors and risk of future nursing  
19 home admission. *Arch Intern Med* 2006;166(9):985-90. doi:  
20 10.1001/archinte.166.9.985  
21  
22 71. Astbury NM, Piernas C, Hartmann-Boyce J, et al. A systematic review and meta-analysis of  
23 the effectiveness of meal replacements for weight loss. *Obes Rev* 2019;20(4):569-87.  
24 doi: 10.1111/obr.12816 [published Online First: 2019/01/24]  
25  
26 72. American College of Sports M, Chodzko-Zajko WJ, Proctor DN, et al. American College of  
27 Sports Medicine position stand. Exercise and physical activity for older adults. *Med Sci*  
28 *Sports Exerc* 2009;41(7):1510-30. doi: 10.1249/MSS.0b013e3181a0c95c  
29  
30 73. Reuben DB, Siu AL. An objective measure of physical function of elderly outpatients. The  
31 Physical Performance Test. *J Am Geriatr Soc* 1990;38(10):1105-12. doi:  
32 10.1111/j.1532-5415.1990.tb01373.x  
33  
34 74. Ware JE, Jr., Sherbourne CD. The MOS 36-item short-form health survey (SF-36). I.  
35 Conceptual framework and item selection. *Med Care* 1992;30(6):473-83.  
36  
37 75. EuroQol Group. EuroQol--a new facility for the measurement of health-related quality of  
38 life. *Health Policy* 1990;16(3):199-208. doi: 10.1016/0168-8510(90)90421-9  
39  
40 76. Mead E, Brown T, Rees K, et al. Diet, physical activity and behavioural interventions for the  
41 treatment of overweight or obese children from the age of 6 to 11 years. *Cochrane*  
42 *Database Syst Rev* 2017;6(6):CD012651-CD51. doi: 10.1002/14651858.CD012651  
43  
44 77. Recker RR, Davies KM, Dowd RM, et al. The effect of low-dose continuous estrogen and  
45 progesterone therapy with calcium and vitamin D on bone in elderly women. A  
46 randomized, controlled trial. *Ann Intern Med* 1999;130(11):897-904.  
47  
48 78. Sterne JAC, Savović J, Page MJ, et al. RoB 2: a revised tool for assessing risk of bias in  
49 randomised trials. *BMJ* 2019;366:l4898-l98. doi: 10.1136/bmj.l4898  
50  
51 79. Reid IR, Ames RW, Evans MC, et al. Long-term effects of calcium supplementation on bone  
52 loss and fractures in postmenopausal women: a randomized controlled trial [see  
53 comments]. *Am J Med* 1995;98(4):331-35.  
54  
55 80. Brignardello-Petersen R, Bonner A, Alexander PE, et al. Advances in the GRADE approach  
56 to rate the certainty in estimates from a network meta-analysis. *J Clin Epidemiol*  
57 2018;93:36-44. doi: 10.1016/j.jclinepi.2017.10.005 [published Online First:  
58 2017/10/17]  
59  
60 81. Puhan MA, Schünemann HJ, Murad MH, et al. A GRADE Working Group approach for rating  
the quality of treatment effect estimates from network meta-analysis. *BMJ*  
2014;349:g5630-g30. doi: 10.1136/bmj.g5630  
82. Yepes-Nuñez JJ, Li S-A, Guyatt G, et al. Development of the summary of findings table for  
network meta-analysis. *J Clin Epidemiol* 2019;115:1-13. doi:  
10.1016/j.jclinepi.2019.04.018 [published Online First: 2019/05/02]

- 1  
2  
3 83. Deng HW, Stegman MR, Davies KM, et al. Genetic determination of variation and  
4 covariation of peak bone mass at the hip and spine. *J Clin Densitom* 1999;2(3):251-63.  
5  
6 84. Anzures-Cabrera J, Sarpatwari A, Higgins JP. Expressing findings from meta-analyses of  
7 continuous outcomes in terms of risks. *Stat Med* 2011;30(25):2967-85. doi:  
8 10.1002/sim.4298 [published Online First: 2011/08/08]  
9  
10 85. Deeks JJ, Higgins JPT, Altman DG (editors). Chapter 10: Analysing data and undertaking  
11 meta-analyses. In: Higgins JPT, Thomas J, Chandler J, Cumpston M, Li T, Page MJ, Welch  
12 VA (editors). *Cochrane Handbook for Systematic Reviews of Interventions* version 6.0  
13 (updated July 2019). Cochrane, 2019. Available from  
14 [www.training.cochrane.org/handbook](http://www.training.cochrane.org/handbook).  
15  
16 86. Rücker G. Network meta-analysis, electrical networks and graph theory. *Res Synth*  
17 *Methods* 2012;3(4):312-24. doi: 10.1002/jrsm.1058 [published Online First:  
18 2012/09/25]  
19  
20 87. Stern Y, Tang MX, Albert MS, et al. Predicting time to nursing home care and death in  
21 individuals with Alzheimer disease. *JAMA* 1997;277(10):806-12.  
22  
23 88. Salanti G. Indirect and mixed-treatment comparison, network, or multiple-treatments  
24 meta-analysis: many names, many benefits, many concerns for the next generation  
25 evidence synthesis tool. *Res Synth Methods* 2012;3(2):80-97. doi: 10.1002/jrsm.1037  
26 [published Online First: 2012/06/11]  
27  
28 89. Rücker G, Schwarzer G. Automated drawing of network plots in network meta-analysis.  
29 *Res Synth Methods* 2016;7(1):94-107. doi: 10.1002/jrsm.1143  
30  
31 90. Krahn U, Binder H, König J. A graphical tool for locating inconsistency in network meta-  
32 analyses. *BMC Med Res Methodol* 2013;13:35-35. doi: 10.1186/1471-2288-13-35  
33  
34 91. Rücker G, Petropoulou M, Schwarzer G. Network meta-analysis of multicomponent  
35 interventions. *Biom J* 2019;10.1002/bimj.201800167. doi: 10.1002/bimj.201800167  
36  
37 92. Rücker G, Schwarzer G. Ranking treatments in frequentist network meta-analysis works  
38 without resampling methods. *BMC Med Res Methodol* 2015;15:58-58. doi:  
39 10.1186/s12874-015-0060-8  
40

#### 41 **Authors' contributions**

42 GT, DS and EK drafted the manuscript. All authors were involved in the planning and design  
43 process of this project and provided critical feedback for the manuscript. All authors approved  
44 the final version of the manuscript. EK will be the guarantor of the review.  
45  
46

#### 47 **Funding statement**

48 This work was funded by the German Federal Ministry of Education and Research (BMBF)  
49 grant number [01KG1903].  
50  
51

#### 52 **Competing interests' statement**

53 GT, DS, GR, HK, WK, CCS, DTV, NSB, DV & EK declare no conflict of interest. LS is a member of  
54 the GRADE working group. JAB is funded by the National Institute on Aging and Office of  
55 Dietary Supplements of the National Institutes of Health under Award Number K23AG051681,  
56 and the R01 AG067416. The funder had no role in preparing the protocol and manuscript.  
57  
58  
59  
60

### Acknowledgements

We thank the information specialist Edith Motschall for reviewing the search strategy. We acknowledge support by Friedrich-Alexander-Universität Erlangen-Nürnberg (FAU) within the funding programme Open Access Publishing.

For peer review only

**PRISMA-P (Preferred Reporting Items for Systematic review and Meta-Analysis Protocols) 2015 checklist: recommended items to address in a systematic review protocol\***

| Section and topic                 | Item No | Checklist item                                                                                                                                                                                                                | Page(s) |
|-----------------------------------|---------|-------------------------------------------------------------------------------------------------------------------------------------------------------------------------------------------------------------------------------|---------|
| <b>ADMINISTRATIVE INFORMATION</b> |         |                                                                                                                                                                                                                               |         |
| Title:                            |         |                                                                                                                                                                                                                               |         |
| Identification                    | 1a      | Identify the report as a protocol of a systematic review                                                                                                                                                                      | 1       |
| Update                            | 1b      | If the protocol is for an update of a previous systematic review, identify as such                                                                                                                                            | n.a.    |
| Registration                      | 2       | If registered, provide the name of the registry (such as PROSPERO) and registration number                                                                                                                                    | 2,6     |
| Authors:                          |         |                                                                                                                                                                                                                               |         |
| Contact                           | 3a      | Provide name, institutional affiliation, e-mail address of all protocol authors; provide physical mailing address of corresponding author                                                                                     | 1       |
| Contributions                     | 3b      | Describe contributions of protocol authors and identify the guarantor of the review                                                                                                                                           | 19      |
| Amendments                        | 4       | If the protocol represents an amendment of a previously completed or published protocol, identify as such and list changes; otherwise, state plan for documenting important protocol amendments                               | n.a.    |
| Support:                          |         |                                                                                                                                                                                                                               |         |
| Sources                           | 5a      | Indicate sources of financial or other support for the review                                                                                                                                                                 | 19      |
| Sponsor                           | 5b      | Provide name for the review funder and/or sponsor                                                                                                                                                                             | 19      |
| Role of sponsor or funder         | 5c      | Describe roles of funder(s), sponsor(s), and/or institution(s), if any, in developing the protocol                                                                                                                            | 19      |
| <b>INTRODUCTION</b>               |         |                                                                                                                                                                                                                               |         |
| Rationale                         | 6       | Describe the rationale for the review in the context of what is already known                                                                                                                                                 | 4-6     |
| Objectives                        | 7       | Provide an explicit statement of the question(s) the review will address with reference to participants, interventions, comparators, and outcomes (PICO)                                                                      | 6       |
| <b>METHODS</b>                    |         |                                                                                                                                                                                                                               |         |
| Eligibility criteria              | 8       | Specify the study characteristics (such as PICO, study design, setting, time frame) and report characteristics (such as years considered, language, publication status) to be used as criteria for eligibility for the review | 6-9     |
| Information sources               | 9       | Describe all intended information sources (such as electronic databases, contact with study authors, trial registers or other grey literature sources) with planned dates of coverage                                         | 9       |
| Search strategy                   | 10      | Present draft of search strategy to be used for at least one electronic database, including planned limits, such that it could be repeated                                                                                    | Table 2 |



|                                    |     |                                                                                                                                                                                                                                                     |       |
|------------------------------------|-----|-----------------------------------------------------------------------------------------------------------------------------------------------------------------------------------------------------------------------------------------------------|-------|
| Study records:                     |     |                                                                                                                                                                                                                                                     |       |
| Data management                    | 11a | Describe the mechanism(s) that will be used to manage records and data throughout the review                                                                                                                                                        | 9     |
| Selection process                  | 11b | State the process that will be used for selecting studies (such as two independent reviewers) through each phase of the review (that is, screening, eligibility and inclusion in meta-analysis)                                                     | 9-10  |
| Data collection process            | 11c | Describe planned method of extracting data from reports (such as piloting forms, done independently, in duplicate), any processes for obtaining and confirming data from investigators                                                              | 10    |
| Data items                         | 12  | List and define all variables for which data will be sought (such as PICO items, funding sources), any pre-planned data assumptions and simplifications                                                                                             | 10    |
| Outcomes and prioritization        | 13  | List and define all outcomes for which data will be sought, including prioritization of main and additional outcomes, with rationale                                                                                                                | 8-9   |
| Risk of bias in individual studies | 14  | Describe anticipated methods for assessing risk of bias of individual studies, including whether this will be done at the outcome or study level, or both; state how this information will be used in data synthesis                                | 10-11 |
| Data synthesis                     | 15a | Describe criteria under which study data will be quantitatively synthesised                                                                                                                                                                         | 11-12 |
|                                    | 15b | If data are appropriate for quantitative synthesis, describe planned summary measures, methods of handling data and methods of combining data from studies, including any planned exploration of consistency (such as I <sup>2</sup> , Kendall's τ) | 11-12 |
|                                    | 15c | Describe any proposed additional analyses (such as sensitivity or subgroup analyses, meta-regression)                                                                                                                                               | 11-12 |
|                                    | 15d | If quantitative synthesis is not appropriate, describe the type of summary planned                                                                                                                                                                  | n.a.  |
| Meta-bias(es)                      | 16  | Specify any planned assessment of meta-bias(es) (such as publication bias across studies, selective reporting within studies)                                                                                                                       | 11    |
| Confidence in cumulative evidence  | 17  | Describe how the strength of the body of evidence will be assessed (such as GRADE)                                                                                                                                                                  | 11    |

**\* It is strongly recommended that this checklist be read in conjunction with the PRISMA-P Explanation and Elaboration (cite when available) for important clarification on the items. Amendments to a review protocol should be tracked and dated. The copyright for PRISMA-P (including checklist) is held by the PRISMA-P Group and is distributed under a Creative Commons Attribution Licence 4.0.**

*From: Shamseer L, Moher D, Clarke M, Ghersi D, Liberati A, Petticrew M, Shekelle P, Stewart L, PRISMA-P Group. Preferred reporting items for systematic review and meta-analysis protocols (PRISMA-P) 2015: elaboration and explanation. BMJ. 2015 Jan 2;349(jan02 1):g7647.*

Database(s): Ovid MEDLINE(R) ALL 1946 to March 05, 2020

Search Strategy:

| #  | Searches                                                                                                                                                                                           |
|----|----------------------------------------------------------------------------------------------------------------------------------------------------------------------------------------------------|
| 1  | obesity/                                                                                                                                                                                           |
| 2  | obesity, morbid/                                                                                                                                                                                   |
| 3  | obesity, abdominal/                                                                                                                                                                                |
| 4  | obesity, metabolically benign/                                                                                                                                                                     |
| 5  | overweight/                                                                                                                                                                                        |
| 6  | (adipos* or obes* or overweight* or over weight*).ti,ab,kf.                                                                                                                                        |
| 7  | or/1-6 [Obesity]                                                                                                                                                                                   |
| 8  | exp behavior therapy/                                                                                                                                                                              |
| 9  | exp counseling/                                                                                                                                                                                    |
| 10 | social support/                                                                                                                                                                                    |
| 11 | program evaluation/                                                                                                                                                                                |
| 12 | exp exercise/                                                                                                                                                                                      |
| 13 | exp exercise therapy/                                                                                                                                                                              |
| 14 | exp exercise movement techniques/                                                                                                                                                                  |
| 15 | "physical education and training"/                                                                                                                                                                 |
| 16 | exp physical fitness/                                                                                                                                                                              |
| 17 | accidental falls/                                                                                                                                                                                  |
| 18 | postural balance/                                                                                                                                                                                  |
| 19 | motor activity/                                                                                                                                                                                    |
| 20 | gait/                                                                                                                                                                                              |
| 21 | exp muscle strength/                                                                                                                                                                               |
| 22 | exp diet/                                                                                                                                                                                          |
| 23 | exp diet therapy/                                                                                                                                                                                  |
| 24 | patient education as topic/                                                                                                                                                                        |
| 25 | health education/                                                                                                                                                                                  |
| 26 | exp health behavior/                                                                                                                                                                               |
| 27 | exp health promotion/                                                                                                                                                                              |
| 28 | life style/                                                                                                                                                                                        |
| 29 | ((obesity adj3 intervention) or program or programme).ti,ab,kf.                                                                                                                                    |
| 30 | (lifestyle or life style).ti,ab,kf.                                                                                                                                                                |
| 31 | exercis*.ti,ab,kf.                                                                                                                                                                                 |
| 32 | (physic* adj (activ* or fit*)).ti,ab,kf.                                                                                                                                                           |
| 33 | (walk* or swim* or aqua or cycl* or weight lift* or danc* or aerobics or balance or electric* muscle stimulation or neuromuscular electric* stimulation or electromyostimulation or ems).ti,ab,kf. |
| 34 | ((physic* or strength* or resist* or circuit or weight or aerob* or cross or endurance or vibration*) adj3 train*).ti,ab,kf.                                                                       |
| 35 | (behavio?ral or behavio?r modification or psychoth* or psychosocial).ti,ab,kf.                                                                                                                     |
| 36 | ((group or cognit* or behav*) adj therap*).ti,ab,kf.                                                                                                                                               |
| 37 | counsel?ing.ti,ab,kf.                                                                                                                                                                              |

|    |                                                                                                                                                                                                                               |
|----|-------------------------------------------------------------------------------------------------------------------------------------------------------------------------------------------------------------------------------|
| 38 | educat*.ti,ab,kf.                                                                                                                                                                                                             |
| 39 | (diet* or healthy nutrition or (nutrition* adj (knowledge or educat* or therap* or program* or intervention*))).ti,ab,kf.                                                                                                     |
| 40 | (low-calori* or calori* restrict* or low-energ* or energ* restrict* or low-carbohydrate or high-carbohydrate or low-fat or high-fat or low-protein or high-protein or vegetarian or vegan or mediterranean or dash).ti,ab,kf. |
| 41 | weight loss/                                                                                                                                                                                                                  |
| 42 | (weight adj1 (reduc* or los* or control* or manag*)).ti,ab,kf.                                                                                                                                                                |
| 43 | or/8-42 [Interventions]                                                                                                                                                                                                       |
| 44 | obesity/ or obesity, abdominal/ or obesity, morbid/ or overweight/ or obesity, metabolically benign/                                                                                                                          |
| 45 | (diet therapy or prevention & control or rehabilitation or therapy or psychology).fs.                                                                                                                                         |
| 46 | 44 and 45 [MeSH/subheading combination]                                                                                                                                                                                       |
| 47 | exp weight reduction programs/                                                                                                                                                                                                |
| 48 | or/46-47 [Obesity-specific interventions]                                                                                                                                                                                     |
| 49 | 7 and 43 [Obesity AND Interventions]                                                                                                                                                                                          |
| 50 | or/48-49 [Obesity interventions complete: (Obesity AND Interventions) OR Obesity-specific interventions]                                                                                                                      |
| 51 | exp aged/                                                                                                                                                                                                                     |
| 52 | geriatrics/                                                                                                                                                                                                                   |
| 53 | frailty/                                                                                                                                                                                                                      |
| 54 | sarcopenia/                                                                                                                                                                                                                   |
| 55 | Independent Living/                                                                                                                                                                                                           |
| 56 | ((old* or senior or age*) adj2 (adult* or person* or subject* or individual* or people or group* or m?n or wom?n or patient* or client* or outpatient* or citizen* or "60or 65" or age*)).ti,ab,kf.                           |
| 57 | (elder* or eldes* or geriat* or geronto* or frail* or sarcopen* or senior* or agedly or ag?ing).ti,ab,kf.                                                                                                                     |
| 58 | community-dwell*.ti,ab,kf.                                                                                                                                                                                                    |
| 59 | ((commun* or indepen*) adj1 (dwell* or livi*)).ti,ab,kf.                                                                                                                                                                      |
| 60 | ((("60" or "65") adj1 year*).ti,ab,kf.                                                                                                                                                                                        |
| 61 | ((advanc* or high*) adj1 age*).ti,ab,kf.                                                                                                                                                                                      |
| 62 | (super adj1 age*).ti,ab,kf.                                                                                                                                                                                                   |
| 63 | (superage* or super-age* or centen* or centa* or nonagen* or octagen* or sept?agen* or supercenten* or senium*).ti,ab,kf.                                                                                                     |
| 64 | or/51-63 [Age group]                                                                                                                                                                                                          |
| 65 | randomized controlled trial.pt.                                                                                                                                                                                               |
| 66 | controlled clinical trial.pt.                                                                                                                                                                                                 |
| 67 | randomi?ed.ab.                                                                                                                                                                                                                |
| 68 | placebo.ab.                                                                                                                                                                                                                   |
| 69 | clinical trials as topic.sh.                                                                                                                                                                                                  |
| 70 | randomly.ab.                                                                                                                                                                                                                  |
| 71 | trial.ti.                                                                                                                                                                                                                     |

|    |                                                                                                                    |
|----|--------------------------------------------------------------------------------------------------------------------|
| 72 | or/65-71                                                                                                           |
| 73 | exp animals/ not humans.sh.                                                                                        |
| 74 | 72 not 73 [Study filter (Cochrane Handbook v5.0.2 2008 RCT filter - sensitivity and precision maximizing version)] |
| 75 | 50 and 64 [Obesity interventions complete AND Age group]                                                           |
| 76 | 75 and 74 [Obesity interventions complete AND Age group AND Study filter]                                          |
| 77 | (exp infant/ or exp child/ or adolescent/) not exp aged/ [Child/adolescent/middle aged adults-only studies]        |
| 78 | 76 not 77 [Remove Child/adolescent/middle aged adults-only studies]                                                |

For peer review only

# BMJ Open

## Effective SLOPE: EffectS of Lifestyle interventions in Older PEople with obesity – a systematic review and network meta-analysis protocol

|                                 |                                                                                                                                                                                                                                                                                                                                                                                                                                                                                                                                                                                                                                                                                                                                                                                                                                                                                                                                                                                                                                                                                                                                                                                                                                                                                                                                                                                                                                                                                                                                 |
|---------------------------------|---------------------------------------------------------------------------------------------------------------------------------------------------------------------------------------------------------------------------------------------------------------------------------------------------------------------------------------------------------------------------------------------------------------------------------------------------------------------------------------------------------------------------------------------------------------------------------------------------------------------------------------------------------------------------------------------------------------------------------------------------------------------------------------------------------------------------------------------------------------------------------------------------------------------------------------------------------------------------------------------------------------------------------------------------------------------------------------------------------------------------------------------------------------------------------------------------------------------------------------------------------------------------------------------------------------------------------------------------------------------------------------------------------------------------------------------------------------------------------------------------------------------------------|
| Journal:                        | <i>BMJ Open</i>                                                                                                                                                                                                                                                                                                                                                                                                                                                                                                                                                                                                                                                                                                                                                                                                                                                                                                                                                                                                                                                                                                                                                                                                                                                                                                                                                                                                                                                                                                                 |
| Manuscript ID                   | bmjopen-2020-038330.R1                                                                                                                                                                                                                                                                                                                                                                                                                                                                                                                                                                                                                                                                                                                                                                                                                                                                                                                                                                                                                                                                                                                                                                                                                                                                                                                                                                                                                                                                                                          |
| Article Type:                   | Protocol                                                                                                                                                                                                                                                                                                                                                                                                                                                                                                                                                                                                                                                                                                                                                                                                                                                                                                                                                                                                                                                                                                                                                                                                                                                                                                                                                                                                                                                                                                                        |
| Date Submitted by the Author:   | 12-Aug-2020                                                                                                                                                                                                                                                                                                                                                                                                                                                                                                                                                                                                                                                                                                                                                                                                                                                                                                                                                                                                                                                                                                                                                                                                                                                                                                                                                                                                                                                                                                                     |
| Complete List of Authors:       | Torbahn, Gabriel; Friedrich-Alexander-Universität Erlangen-Nürnberg, Institute for Biomedicine of Aging<br>Schoene, Daniel; Friedrich-Alexander-Universität Erlangen-Nürnberg, Institute of Medical Physics<br>Schwingshackl, Lukas; Medical Center - University of Freiburg, Faculty of Medicine, Institute for Evidence in Medicine<br>Rücker, Gerta; Medical Center - University of Freiburg, Faculty of Medicine, Institute of Medical Biometry and Medical Informatics<br>Knüttel, Helge; University of Regensburg, University Library<br>Kemmler, W; University of Erlangen-Nürnberg, Institute of Medical Physics<br>Sieber, Cornel; Friedrich-Alexander-Universität Erlangen-Nürnberg, Institute for Biomedicine of Aging; Kantonsspital Winterthur, Department of Medicine<br>Batsis, John; Dartmouth-Hitchcock Medical Center, and the Dartmouth Centers for Health and Aging, Sections of General Internal Medicine and Weight and Wellness; Dartmouth College Institute for Health Policy and Clinical Practice, Geisel School of Medicine at Dartmouth<br>Villareal, Dennis; Baylor College of Medicine, Division of Endocrinology, Diabetes and Metabolism<br>Ströbele-Benschop, Nanette; University of Hohenheim, Department of Nutritional Psychology, Institute of Nutritional Medicine<br>Volkert, Dorothee; Friedrich-Alexander-Universität Erlangen-Nürnberg, Institute for Biomedicine of Aging<br>Kiesswetter, Eva; Friedrich-Alexander-Universität Erlangen-Nürnberg, Institute for Biomedicine of Aging |
| <b>Primary Subject Heading</b>: | Geriatric medicine                                                                                                                                                                                                                                                                                                                                                                                                                                                                                                                                                                                                                                                                                                                                                                                                                                                                                                                                                                                                                                                                                                                                                                                                                                                                                                                                                                                                                                                                                                              |
| Secondary Subject Heading:      | Nutrition and metabolism, Sports and exercise medicine                                                                                                                                                                                                                                                                                                                                                                                                                                                                                                                                                                                                                                                                                                                                                                                                                                                                                                                                                                                                                                                                                                                                                                                                                                                                                                                                                                                                                                                                          |
| Keywords:                       | GERIATRIC MEDICINE, NUTRITION & DIETETICS, SPORTS MEDICINE                                                                                                                                                                                                                                                                                                                                                                                                                                                                                                                                                                                                                                                                                                                                                                                                                                                                                                                                                                                                                                                                                                                                                                                                                                                                                                                                                                                                                                                                      |
|                                 |                                                                                                                                                                                                                                                                                                                                                                                                                                                                                                                                                                                                                                                                                                                                                                                                                                                                                                                                                                                                                                                                                                                                                                                                                                                                                                                                                                                                                                                                                                                                 |

1  
2  
3  
4  
5  
6  
7  
8  
9  
10  
11  
12  
13  
14  
15  
16  
17  
18  
19  
20  
21  
22  
23  
24  
25  
26  
27  
28  
29  
30  
31  
32  
33  
34  
35  
36  
37  
38  
39  
40  
41  
42  
43  
44  
45  
46  
47  
48  
49  
50  
51  
52  
53  
54  
55  
56  
57  
58  
59  
60

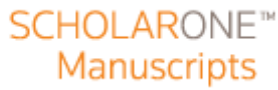



I, the Submitting Author has the right to grant and does grant on behalf of all authors of the Work (as defined in the below author licence), an exclusive licence and/or a non-exclusive licence for contributions from authors who are: i) UK Crown employees; ii) where BMJ has agreed a CC-BY licence shall apply, and/or iii) in accordance with the terms applicable for US Federal Government officers or employees acting as part of their official duties; on a worldwide, perpetual, irrevocable, royalty-free basis to BMJ Publishing Group Ltd ("BMJ") its licensees and where the relevant Journal is co-owned by BMJ to the co-owners of the Journal, to publish the Work in this journal and any other BMJ products and to exploit all rights, as set out in our [licence](#).

The Submitting Author accepts and understands that any supply made under these terms is made by BMJ to the Submitting Author unless you are acting as an employee on behalf of your employer or a postgraduate student of an affiliated institution which is paying any applicable article publishing charge ("APC") for Open Access articles. Where the Submitting Author wishes to make the Work available on an Open Access basis (and intends to pay the relevant APC), the terms of reuse of such Open Access shall be governed by a Creative Commons licence – details of these licences and which [Creative Commons](#) licence will apply to this Work are set out in our licence referred to above.

Other than as permitted in any relevant BMJ Author's Self Archiving Policies, I confirm this Work has not been accepted for publication elsewhere, is not being considered for publication elsewhere and does not duplicate material already published. I confirm all authors consent to publication of this Work and authorise the granting of this licence.

**Title:**

Effective SLOPE: EffectS of Lifestyle interventions in Older PEople with obesity – a systematic review and network meta-analysis protocol

**Authors and institutions:**

Gabriel Torbahn<sup>1</sup>, Daniel Schoene<sup>2</sup>, Lukas Schwingshackl<sup>3</sup>, Gerta Rücker<sup>4</sup>, Helge Knüttel<sup>5</sup>, Wolfgang Kemmler<sup>2</sup>, Cornel C. Sieber<sup>1,6</sup>, John A. Batsis<sup>7,8</sup>, Dennis T. Villareal<sup>9</sup>, Nanette Ströbele-Benschop<sup>10</sup>, Dorothee Volkert<sup>1</sup>, Eva Kiesswetter<sup>1</sup>

<sup>1</sup> Institute for Biomedicine of Aging, Friedrich-Alexander-Universität Erlangen-Nürnberg, Nuremberg, Germany

<sup>2</sup> Institute of Medical Physics, Friedrich-Alexander-Universität Erlangen-Nürnberg, Erlangen, Germany

<sup>3</sup> Institute for Evidence in Medicine, Medical Center - University of Freiburg, Faculty of Medicine, University of Freiburg, Freiburg, Germany

<sup>4</sup> Institute of Medical Biometry and Statistics, Medical Center - University of Freiburg, Faculty of Medicine, University of Freiburg, Freiburg, Germany

<sup>5</sup> University Library, University of Regensburg, Regensburg, Germany

<sup>6</sup> Department of Medicine, Kantonsspital Winterthur, Winterthur, Switzerland

<sup>7</sup> Sections of General Internal Medicine and Weight and Wellness, Dartmouth-Hitchcock Medical Center, and the Dartmouth Centers for Health and Aging, Lebanon, NH, USA

<sup>8</sup> Geisel School of Medicine at Dartmouth, The Dartmouth Institute for Health Policy and Clinical Practice, Dartmouth College, Hanover, NH, USA

<sup>9</sup> Division of Endocrinology, Diabetes and Metabolism, Baylor College of Medicine, Houston, TX, USA

<sup>10</sup> Institute of Nutritional Medicine, Department of Nutritional Psychology, University of Hohenheim, Stuttgart, Germany

**Corresponding author:**

Gabriel Torbahn, MPH

Institute for Biomedicine of Aging, Friedrich-Alexander-Universität Erlangen Nürnberg

Kobergerstr. 60

90408 Nürnberg

Germany

E-Mail: [gabriel.torbahn@fau.de](mailto:gabriel.torbahn@fau.de)

Phone: +49 911 530 296 165

**Word count** (excluding title page, abstract, references, figures and tables, max 4000 words):  
3850



## Abstract

### Introduction

Obesity is highly prevalent in older adults aged 65 years or older. Different lifestyle interventions (diet, exercise, self-management) are available but benefits and harms have not been fully quantified comparing all available health promotion interventions. Special consideration must be given to functional outcomes and possible adverse effects (loss of muscle and bone mass, hypoglycaemia) of weight loss interventions in this age group. The objective of this study is to synthesize the evidence regarding the effects of different types and modalities of lifestyle interventions, or their combinations, on physical function and obesity-related outcomes such as body composition in older adults with obesity.

### Methods and analyses

Six databases (Medline, Embase, Cochrane Central Register of Controlled Trials, Cinahl, Psychinfo and Web of Science) and two trial registries (Clinicaltrials.gov and the WHO International Clinical Trials Registry Platform) will be searched for randomised controlled trials of lifestyle interventions in older adults with obesity. Screening (title/abstract and full-text) and data extraction of references as well as assessment of risk of bias and rating of the certainty of evidence (Grading of Recommendations, Assessment, Development and Evaluation (GRADE) for network meta-analyses) will be performed by two reviewers independently. Frequentist random-effects network meta-analyses will be conducted to determine the pooled effects from each intervention.

### Ethics and dissemination

We will submit our findings to peer-reviewed journals and present at national and international conferences as well as in scientific medical societies. Patient-targeted dissemination will involve local and national advocate groups.

### PROSPERO registration number

CRD42019147286

### Strengths and limitations of this study

- This will be the first NMA on lifestyle interventions in older adults with obesity
- Rather than focussing on weight loss, physical functioning will be the primary interest due to its subjective and objective relevance for older people

- Methods will be applied based on the standards of the updated version 6.0 of the Cochrane Handbook for Interventions (updated July 2019)
- Recommendations will be derived based on the results according to the GRADE approach for NMA
- Heterogeneity (clinical and statistical) will be evaluated and discussed in detail

For peer review only

## Introduction

Obesity is defined as an abnormal and excessive accumulation of body fat,<sup>1</sup> while on a population-level, is defined using a body mass index (BMI)  $\geq 30$  kg/m<sup>2</sup>. Over the past four decades, the prevalence of obesity has been increasing worldwide across all age groups.<sup>2</sup> The rates of obesity in older adults, the fastest growing population segment<sup>3</sup> have now exceeded 40%, making this a public health concern.<sup>4</sup> As BMI has poor sensitivity in older adults due to age-related changes in body composition and a reduction of body height,<sup>5</sup> waist circumference and, more directly, objectively-measured fat mass can be considered in ascertaining obesity. In the United States, central obesity measured using waist circumference has been found in ~63% of community-dwelling adults aged  $\geq 60$  years.<sup>6</sup> The prevalence of obesity according to a high proportion of fat mass is 64% and 77% in German women and men  $\geq 70$  years respectively.<sup>7,8</sup> Due to the higher mechanical load of a higher body weight, for a long time obesity has not been linked to a low proportion of muscle mass. However, in recent years, sarcopenic obesity, a syndrome combining obesity with low muscle mass and strength or physical function has gained considerable attention. Sarcopenic obesity is a largely underdiagnosed condition in clinical practice, and prevalence rates of up to 94% in older adults depending on the operationalization of this construct have been reported.<sup>9</sup>

In community-dwelling older adults, obesity and sarcopenic obesity are associated with increased mortality<sup>10,11</sup> as well as with reduced quality of life (QoL).<sup>12,13</sup> Contrary, several cohort studies have shown a lower risk for mortality in people with obesity and specific diseases such as type 2 diabetes, coronary artery disease or serious illnesses,<sup>14-16</sup> which was described as 'obesity paradox'. While research on this controversial phenomenon is still ongoing, several hypotheses are discussed, such as collider bias or effect modification.<sup>17-19</sup> Obesity is a well-known risk factor for metabolic and cardiovascular diseases, pulmonary abnormalities and certain types of cancer in older age.<sup>20</sup> Furthermore, obesity is associated with the onset of osteoarthritis in older adults,<sup>21</sup> one of the most disabling medical conditions, severely affecting one's QoL.<sup>22</sup> A meta-analysis of 26 prospective studies in older adults revealed obesity as risk factor for functional decline<sup>23</sup> which is of utmost importance for independent living.<sup>24,25</sup> Older adults with sarcopenic obesity are considered a group at particular risk for functional limitations as they are suffering from two conditions determining functional disability simultaneously.<sup>26,27</sup> Moreover, in older people obesity and sarcopenic obesity are associated with an increased risk of falls<sup>28-31</sup> and nursing home admissions.<sup>32</sup> Alley

1  
2  
3 and colleagues have predicted that given the increasing prevalence of obesity, a disabled older  
4 person with obesity may become the most common phenotype of frailty<sup>33</sup> – another  
5 syndrome in the geriatric population that is associated with decline in health and function<sup>34 35</sup>  
6 – posing a marked personal and societal burden. In 2015, a high BMI contributed to about 120  
7 million disability-adjusted life years (DALY) representing ~5% of DALYs from any causes among  
8 adults worldwide.<sup>2</sup> A recent systematic review found that compared to healthy weight, the  
9 total annual health care costs are 30% (interquartile range: 20-34%) higher in middle-aged and  
10 older people with obesity.<sup>36</sup> An analysis of the World Obesity Foundation in 2017 has  
11 forecasted that costs of consequences of overweight and obesity will further increase in the  
12 future.<sup>37</sup>

13  
14 Although other therapeutic options to treat obesity exist (e.g. bariatric surgery), lifestyle  
15 strategies should always be first-line treatment.<sup>38-40</sup> Lifestyle interventions mainly focus on  
16 diet, exercise, self-management or combined strategies that vary in treatment modality (e.g.  
17 specific content), type of delivery (e.g. level of supervision) and dose. Lifestyle interventions  
18 mainly focus on diet (e.g. calorie restriction,<sup>41</sup> high protein diet<sup>42</sup>), exercise (e.g. aerobic or  
19 resistance<sup>43</sup>), self-management interventions (e.g. relapse prevention or self-monitoring  
20 techniques<sup>44</sup> or combined strategies that vary in treatment modality (e.g. specific content),  
21 type of delivery (e.g. level of supervision, individual vs group sessions, in person vs technology)  
22 and dose (e.g. duration, intensity). Findings from younger people cannot be generalised to  
23 older people due to higher levels of multimorbidity, frailty, sarcopenia and malnutrition risk.<sup>45</sup>  
24 Moreover, harmful side effects of interventions aiming at weight loss have to be considered,  
25 such as reduced muscle mass<sup>46</sup> and bone mineral density.<sup>47</sup> Thus, in older people functional  
26 decline, functional limitations as well as the risk of adverse events, such as falls and fractures  
27 may be increased.<sup>48</sup> Very low caloric diets may lead to an inadequate intake of nutrients and  
28 consequently to the development of malnutrition, another geriatric syndrome associated with  
29 adverse health events.<sup>49</sup> In addition, perceived and actual barriers differ between younger and  
30 older adults in their impact on adopting lifestyle changes.<sup>50</sup> Despite these issues, obesity  
31 treatment in older adults is still not sufficiently addressed in existing obesity guidelines.<sup>39 51 52</sup>  
32  
33 Several systematic reviews on obesity treatment in older adults have been published between  
34 2006-2019<sup>53-63</sup> including 126 publications of more than 60 distinct RCTs. Reviews however, did  
35 not identify the same studies for inclusion due to different search strategies, databases,  
36 search dates as well as differing definitions of obesity and applying various age cut-offs. They  
37  
38  
39  
40  
41  
42  
43  
44  
45  
46  
47  
48  
49  
50  
51  
52  
53  
54  
55  
56  
57  
58  
59  
60

1  
2  
3 generally agree that weight-loss interventions in older adults do not cause poor health  
4 outcomes (e.g. higher risk for mortality for those randomized to the weight-loss group) and  
5 significantly reduce weight). Further, more limited evidence demonstrates improvements in  
6 measures of physical performance, such as gait speed. Combined interventions (e.g., including  
7 dietary and exercise components) are to be favoured to preserve muscle mass, bone mineral  
8 density and to improve physical performance. However, self-management strategies, which  
9 are important for long-term weight maintenance from studies in younger adults,<sup>64</sup> have not  
10 been separately reported and discussed in existing reviews on the management of obesity in  
11 older adults. In addition, methodological issues prevent the drawing of firm conclusions, e.g.  
12 recommendations for obesity treatment. These include too specific searches in only one  
13 database, not covering the complete time period of databases and application of language  
14 restrictions. This must be considered insufficient as it likely missed relevant evidence.<sup>65 66</sup>  
15 Further, a quality rating of the included RCTs was missing in the majority of these systematic  
16 reviews or when done, some used no standardised tools. The only published meta-analysis  
17 dates back to 2010,<sup>63</sup> and there is no meta-analysis available for functional outcomes in older  
18 people with obesity. Considering, recently published intervention studies, e.g. Ard et al.  
19 (2018)<sup>67</sup> and Beavers et al. (2019),<sup>68</sup> it is likely that accumulated evidence enables quantitative  
20 syntheses.

21  
22  
23  
24  
25  
26  
27  
28  
29  
30  
31  
32  
33  
34  
35  
36  
37  
38  
39  
40  
41  
42  
43  
44  
45  
46  
47  
48  
49  
50  
51  
52  
53  
54  
55  
56  
57  
58  
59  
60  
These limitations of existing systematic reviews highlight an evidence gap and justify the need  
for a thoroughly conducted high-quality systematic review according to the updated  
standards described by the Cochrane Collaboration for network meta-analysis.<sup>69 70</sup> As older  
adults are particularly susceptible to negative effects of excess body mass on physical function  
due to the age-related decline in muscle mass and strength<sup>20</sup> and frequently report the priority  
of functional outcomes related to mobility and daily life tasks,<sup>71</sup> these outcomes should be  
investigated comprehensively.

An important question remaining is which type of lifestyle intervention or treatment modality  
offers optimal benefits in older adults with obesity. As there exists a large number of possible  
interventions, multiple pairwise meta-analyses are insufficient to provide an answer of high  
certainty. Therefore, we will conduct a comprehensive systematic review with network meta-  
analyses (NMA) of RCTs to synthesize the evidence regarding the beneficial and potentially  
harmful effects of different types and modalities of lifestyle interventions, or their

1  
2  
3 combinations, on physical function and obesity-related outcomes such as body composition  
4 in older adults with obesity and sarcopenic obesity.  
5  
6

## 7 **Methods and analysis**

### 8 **Reporting**

9  
10 We report this protocol according to the PRISMA-statement for systematic review protocols  
11 (PRISMA-P, (see online supplementary file 1)),<sup>72</sup> the additional guidance for NMA by Chaimani  
12 et al<sup>73</sup> and the guidance for systematic reviews of older adults by Shenkin et al<sup>74</sup> to ensure  
13 thorough reporting and implementation. The methodology is preregistered on the  
14 International Prospective Register of Systematic Reviews (PROSPERO) (registration number  
15 CRD42019147286).<sup>75</sup>  
16  
17

### 18 **Eligibility criteria**

19 We will select primary studies according to the criteria below.  
20  
21

#### 22 *Population*

23  
24 To focus this systematic review on older adults, we will include studies including adults with a  
25 minimum age of 60 years and a mean of  $\geq 65$  years.<sup>76</sup> Participants will be classified as obese if  
26 one of the following criteria is fulfilled: percentage of total body fat mass  $\geq 35\%$  and  $\geq 25\%$ <sup>77</sup> or  
27 waist circumference of  $\geq 88\text{cm}$  and  $\geq 102\text{cm}$  for women and men,<sup>78</sup> or BMI, applying the  
28 standard adult cut-off of  $\geq 30\text{kg/m}^2$  since there is no consensus on age-adjusted cut-offs.<sup>79</sup> If  
29 proven valid, we will, however consider different cut-off values for these criteria, e.g. in Asian  
30 populations. For all three operationalizations, the methods of measurement applied by  
31 individual studies will be used. When studies report mixed samples of older adults with  
32 overweight and obesity, we will contact the authors to request the data for the subgroup with  
33 obesity. If the provision of data is not possible, the study will be excluded. No consensus  
34 definition of sarcopenic obesity exists and various operationalisations are in use.<sup>9</sup> As such, the  
35 definition applied by the primary study will be used, and we shall acknowledge differences in  
36 potential sub-group or sensitivity analyses, if possible. Due to the high prevalence of  
37 multimorbidity in older people and existing obesity-related co-morbidities, participants with  
38 common comorbidities of obesity (e.g. diabetes, cardiovascular, metabolic syndrome, chronic  
39 kidney disease, osteoarthritis and geriatric syndromes (e.g. frailty and sarcopenia)) will be  
40 included. We will only include studies comprising community-dwelling older adults, due to the  
41 predictive value of obesity for nursing home admissions.<sup>80</sup> Studies focusing on animals,  
42  
43  
44  
45  
46  
47  
48  
49  
50  
51  
52  
53  
54  
55  
56  
57  
58  
59  
60

1  
2  
3 genetics or biochemistry will be excluded. References that have not been included after full-  
4 text screening will be listed in a table with the respective reason(s) for exclusion.  
5  
6

### 7 *Interventions*

8  
9 We will include any type of lifestyle intervention, e.g. diet, exercise, self-management, as well  
10 as all treatment modalities and their combinations with all types of deliveries and doses. For  
11 the dietary component, interventions affecting energy balance, such as energy restriction,  
12 balanced (healthy) diet (e.g. food pyramid), Mediterranean diet, high-protein diet, low-fat  
13 diet, moderate-carbohydrate diet, low-carbohydrate diet, low glycaemic index/glycaemic load  
14 diet, vegetarian diet, DASH-diet will be considered. Interventions providing only micronutrient  
15 supplements (e.g. Vitamin D) as well as studies using only very low energy diets (<800  
16 kcal/day) or total diet replacement will be excluded.<sup>81</sup> Additionally, RCTs focussing on  
17 substances such as secondary plant products (e.g. polyphenols), components of  
18 macronutrients (e.g. fatty (docosahexaenoic acid) or amino acids (e.g. leucin)) and fibres will  
19 also be excluded. The exercise component will be defined as any planned, structured, and  
20 repetitive movement with the objective to improve or maintain physical fitness, e.g. aerobic,  
21 resistance, balance training, according to the definition of the American College of Sports  
22 Medicine.<sup>82</sup> We will also consider physically supported methods, such as electrical muscle  
23 stimulation and vibration training when combined with gross movements or done in an  
24 upright position. Finally, as recommended in obesity guidelines<sup>83</sup> we will include all self-  
25 management interventions that intend to support behaviour changes (such as motivational  
26 interviewing, social support, cognitive-therapeutic intervention).<sup>84</sup> This is owed to the fact  
27 that many (older) people with chronic diseases (such as diabetes or obesity) have difficulties  
28 to control intended behavioural changes (such as improving eating behaviour, increasing  
29 physical activity and decreasing sedentary time).<sup>85</sup> In addition, self-efficacy, self-regulation  
30 skills were found important mediators for successful weight-change.<sup>86</sup>  
31  
32  
33  
34  
35  
36  
37  
38  
39  
40  
41  
42  
43  
44  
45  
46  
47  
48  
49

### 50 *Comparators*

51 Since NMA will be conducted, all interventions will be compared to each other. Additionally,  
52 control groups, such as usual care or health counselling, will be considered as comparators.  
53  
54  
55

### 56 *Outcomes*

57 Only previously validated outcomes will be considered and need to be measured at least pre-  
58 and post-intervention.  
59  
60

### *Main Outcome*

1  
2  
3 The change in **functional status** with focus on physical function was shown to be important to  
4 health and adverse outcomes<sup>24 25</sup> and patient-relevant<sup>71</sup> and will therefore be our main  
5 outcome. This includes standard measures of strength, mobility and functional performance  
6 for independence in daily living, including their modifications. Common measurements  
7 include but are not limited to one-leg stance (balance), gait speed (gait, mobility), 6-min-walk  
8 test (endurance), repeated chair stands (functional strength, lower extremity function), grip  
9 strength (strength, overall function), leg power as well as composite scores of functional tests  
10 such as the Short-Physical-Performance-Battery (SPPB)<sup>25</sup> or the Physical Performance Test  
11 (PPT).<sup>87</sup> Patient-reported outcomes of functional status (e.g. Late-Life Function and Disability  
12 Instrument (LLFDI)) and digital measurements (e.g. instrumented gait analysis) will also be  
13 considered.

#### 23 *Other outcomes*

24 To evaluate changes in **weight and body composition**, we will consider measures such as total  
25 body mass, fat mass (e.g. total, central, peripheral), lean mass, muscle mass (e.g. total,  
26 appendicular, lower extremity skeletal), bone mineral density (e.g. hip, lumbar spine, whole  
27 body).

28 **(Health-related) quality of life** will be summarised when reported by standardized  
29 instruments such as 36-Item Short Form Survey (SF-36)<sup>88</sup> or EuroQol-5D (EQ-5D).<sup>89</sup> If reported  
30 in primary studies, **emotional status** (e.g. depressive symptoms, depression), **social**  
31 **participation** (e.g. informal social relationships, community life) and satisfaction with  
32 intervention will also be captured.

33 Data on the occurrence of mortality, falls, fractures, hospital admission and nursing home  
34 placement as well as for other health-related event data (e.g. hypoglycaemia, hypotension),  
35 no matter if reported as outcome or adverse event, will also be considered for the current  
36 analysis.

#### 37 *Design of primary studies*

38 We will include (quasi-) RCTs (parallel and cross-over). Due to a lower level of initial fitness,  
39 prevalent health restrictions and the time needed to respond to treatment, we will include  
40 studies with intervention durations of  $\geq 12$  weeks.<sup>50</sup>

41 We will not set any restrictions regarding language or time frame. We will involve colleagues  
42 who are fluent in the respective languages or use online translators (e. g.  
43 <https://www.deepl.com/home>).



1  
2  
3 Conference abstracts will be excluded.  
4

### 5 ***Search strategy***

6  
7 Six electronic databases (Medline, Embase, Cochrane Central, CINAHL, PsychInfo and Web of  
8 Science) for published trials and two trial registries (Clinicaltrials.gov, WHO International  
9 Clinical Trials Registry Platform) for unpublished or ongoing trials will be searched. We  
10 developed the search strategy for Medline (via Ovid) (see online supplementary file 2) using a  
11 search block for people aged  $\geq 65$  years and adapted a block for interventions from a recently  
12 published Cochrane review evaluating lifestyle interventions in paediatric patients with  
13 overweight and obesity, which was reviewed and revised by information specialists.<sup>90</sup> For  
14 other databases, the search strategy will be adapted according to the database-specific  
15 requirements. Additionally, we will screen reference lists of published SRs and eligible RCTs  
16 for potential consideration of further primary RCTs and will contact the advisory board which  
17 consists of clinical and scientific experts to enquire whether all relevant studies were  
18 identified.  
19  
20  
21  
22  
23  
24  
25  
26  
27  
28

### 29 ***Selection process***

30  
31 Identified references will be saved in Endnote and after excluding duplicates, references will  
32 be uploaded to Covidence (<http://www.covidence.org>). Two reviewers (GT, DS) will  
33 independently screen titles/abstracts and full-texts for eligibility according to the criteria  
34 described above. The title/abstract screening will be piloted using the first 200 references and  
35 in case of too many deviations ( $>10\%$ ), it will be revised. Disagreements will be solved by  
36 discussion or if no consensus can be reached by a third reviewer who will be asked based on  
37 his/her expertise (nutrition/general (EK), exercise (WK), self-management (NSB)). If relevant  
38 information is lacking, we will contact the corresponding author/s twice at a weekly interval.  
39  
40  
41  
42  
43  
44  
45  
46

### 47 ***Data extraction***

48  
49 Two reviewers (GT, DS) will extract data of included references independently using a piloted  
50 data extraction table. In case of no consensus, a third reviewer (based on expertise) will solve  
51 disagreements. If relevant data is missing, we will contact the corresponding author/s twice  
52 at weekly intervals.  
53  
54

55  
56 When extracting the data, we will consider the following information:

57 **study characteristics:** e.g. author, publication year, eligibility criteria, setting, study duration,  
58 sample size, follow-up time, conflict of interest;  
59  
60

1  
2  
3 **participants' characteristics:** e.g. age, sex, ethnicity, BMI, body composition (e.g. fat mass,  
4 muscle mass, height/weight adjusted indices), comorbidities (e.g. diabetes, cardiovascular  
5 disease), geriatric syndromes (e.g. sarcopenia, frailty, cognitive impairment), functional  
6 status, lifestyle behaviour (e.g. sedentary);  
7  
8

9  
10 **intervention characteristics:** type and modality, type of delivery, dose (e.g. duration,  
11 frequency, intensity), control arms, co-interventions, compliance and adherence, drop out,  
12 (serious) adverse events related to intervention;  
13  
14

15 **outcomes:** baseline values and follow-up values of functional status, BMI, weight, body  
16 composition (lean mass, fat mass), quality of life, emotional status, social participation and  
17 any reported poor health outcome as reported by study authors.  
18  
19

### 20 ***Assessment of risk of bias***

21  
22 The risk of bias will be assessed after a pilot trial (n=3) by two reviewers (GT, DS; not blinded  
23 to authors and journal of primary studies) independently using the revised Cochrane risk of  
24 bias tool (RoB 2.0) for RCTs.<sup>91 92</sup> According to this, sources of bias will be identified by  
25 assessing: i) the randomization process, ii) deviations from intended interventions, iii) missing  
26 outcome data, iv) measurement of the outcome and v) selection of the reported result. For  
27 each domain, available algorithms will be followed to answer the signalling questions  
28 (response options: yes, probably yes, probably no, no, or no information) and to judge the risk  
29 of bias as low, some concerns, or high. The overall risk of bias will also be rated as low (if low  
30 risk of bias in all domains), some concerns (at least one domain is rated as having some  
31 concerns but no domain is rated by a high risk of bias), or high (if at least one domain is judged  
32 with a high risk of bias or multiple domains are rated as having some concerns which might  
33 impact the confidence in a result). We will present results in a risk of bias summary graph.  
34  
35  
36  
37  
38  
39  
40  
41  
42  
43  
44  
45

### 46 ***Assessment of certainty of evidence***

47  
48 Grading of Recommendations, Assessment, Development and Evaluation (GRADE) approach  
49 for NMA will be used to assess the certainty of evidence.<sup>93-95</sup> In addition to the risk of bias  
50 rating for every outcome, this includes the rating of direct and indirect evidence for  
51 inconsistency, indirectness and dissemination bias. In case of high certainty and a similar  
52 contribution of direct and indirect evidence to the network estimate, the highest rating will  
53 be used but could be further down-rated for incoherence and imprecision. In case of  
54 insufficient evidence as well as moderate, low or very low certainty, the indirect estimate will  
55 be rated by the lowest of two direct comparisons included in first-order loops and could be  
56  
57  
58  
59  
60

1  
2  
3 further down-rated for intransitivity. Dissemination bias will be investigated by searching for  
4 unpublished trials (see section search strategies). 'Summary of Findings' tables adapted for  
5 NMA results will be presented, similar to the proposal by Yepes-Nuñez et al.<sup>96</sup>  
6  
7

## 8 9 **Statistical analyses**

### 10 *Measures of treatment effect*

11  
12 Effect sizes for continuous outcomes (e.g. weight loss, muscle strength) will be expressed as  
13 mean difference (MD) or standardised mean difference (SMD) with 95% confidence intervals  
14 (95%-CI). For dichotomous outcomes (e.g. negative health outcome such as death), effect  
15 sizes will be expressed as risk ratios (RR) with 95%-CI.<sup>97</sup> In exceptional cases (i.e. if a minor  
16 number of RCTs expressed an negative health outcome continuously while the majority used  
17 dichotomous outcomes), the outcomes reported as continuous or categorical will be  
18 dichotomized.<sup>98</sup> If the post-intervention values with the corresponding standard deviation  
19 (SD) are not available, the changed scores with the corresponding SD will be used.<sup>99</sup>  
20  
21  
22  
23  
24  
25  
26  
27

### 28 *Data synthesis*

29  
30 We will conduct random effects model network meta-analyses (NMA) based on a frequentist  
31 approach to derive pooled estimates for all outcomes.<sup>100</sup> We will use the R package  
32 'netmeta'.<sup>101</sup> In NMA, evidence from direct comparisons and indirect comparisons is averaged  
33 to calculate a network estimate. The key requirement for conducting NMA is that the  
34 transitivity assumption - to compare two interventions via an indirect route in the network -  
35 is ensured. We assume that for our planned analyses, all interventions are jointly  
36 randomisable<sup>73 102</sup> and that all participants are likely to receive any kind of included  
37 interventions. Network graphs will be generated by function *netgraph()* of netmeta.<sup>101 103</sup> We  
38 will assess global incoherence by decomposing the Q statistic into heterogeneity (within  
39 designs) and inconsistency (between designs) and visualise this using a net-heat plot.<sup>104</sup> In  
40 addition, We will report and assess inconsistency by calculating differences between direct  
41 and indirect effect estimates using descriptive z-tests (function *netsplit()*) and report the  
42 distribution of direct and indirect evidence. The treatment modalities (e.g. very low caloric  
43 diet, aerobic exercise, their combination or no intervention (e.g. health counselling, healthy  
44 eating/ exercise advise)) will build the nodes of the network providing maximizing similarity  
45 within and minimizing similarity between the nodes.<sup>93</sup> To further identify important  
46 determinants of efficacy and safety, nodes will be further defined, e.g. according to the  
47 duration, intensity, mode of delivery of interventions.<sup>105</sup> Based on data availability, these  
48  
49  
50  
51  
52  
53  
54  
55  
56  
57  
58  
59  
60

1  
2  
3 nodes will be defined after data extraction. Additionally, we will analyse the components (e.g.  
4 of combined interventions using an additive model for multicomponent interventions.<sup>106</sup>  
5  
6 Models of this type allow disentangling the effects of all single components (e.g. very low  
7 caloric diet (A), aerobic exercise (B), behavioural group counselling (C)) of a multicomponent  
8 intervention arm consisting of at least two single components (e.g. A+B, A+C, B+C or A+B+C).  
9  
10 Since we do not believe that lifestyle interventions that are available for treatment of obesity  
11 may fulfil the additivity assumption for component NMA (CNMA) – i.e. the effect of a  
12 multicomponent intervention equals the sum of their components without any interactions –  
13 we will use the interaction CNMA model which is implemented in the function *netcomb()* of  
14 *netmeta*.<sup>101 106</sup> In the case of disconnected networks, we will reconnect the networks if  
15 possible (i.e. presence of at least one common component in the subnetworks). This feature  
16 of CNMA is also implemented in *netmeta* (function *discomb()*).  
17

18  
19 A secondary data analysis will be conducted using intervention types as network nodes (e.g.  
20 diet, exercise, self-management). Results of NMA will be presented as forest plots. We will  
21 present league tables containing relative treatment effects for all direct comparisons (function  
22 *netleague()*) and a ranking of all treatments by P-scores.<sup>107</sup>  
23

### 24 *Sensitivity and subgroup analyses*

25  
26 If possible, sensitivity analyses will be conducted by only including studies rated as low risk of  
27 bias. We will try to conduct subgroup analyses for type of obesity (sarcopenic obesity vs  
28 obesity), intervention duration (</> 6 months), age (</> 75 years), sex, BMI-group (</> 35  
29 kg/m<sup>2</sup>) and co-morbidities, such as diabetes or metabolic syndrome and frailty status.  
30 Patients' characteristics for subgroup analysis were selected based on the assumption that  
31 lifestyle interventions might work differently in people who differ in aspects like vulnerability,  
32 resilience and body composition.  
33

### 34 **Patient and public involvement**

35  
36 Before the start of this NMA, we have conducted and are currently analysing a qualitative  
37 study with semi-structured interviews in older persons with obesity. The aim is to obtain  
38 further information on patients' motives, barriers, experiences and perceptions regarding  
39 therapeutic lifestyle interventions and thus, potentially identify evidence gaps. The results will  
40 be published in a separate manuscript.  
41  
42  
43  
44  
45  
46  
47  
48  
49  
50  
51  
52  
53  
54  
55  
56  
57  
58  
59  
60

1  
2  
3 In addition, we discuss patient-relevant outcomes, existing obstacles that exacerbate the  
4 process of contacting this population of patients as well as potential dissemination strategies  
5 with representatives of German patient advocate groups.  
6  
7

### 8 9 **Ethics and dissemination**

10 For NMA, there is no direct data collection from human participants and hence, no ethical  
11 approval is necessary.  
12

13 We will submit our research articles to peer-reviewed journals and will present our results at  
14 national and international conferences. Involved experts will disseminate the results in  
15 scientific and medical societies. We will further disseminate our project via partner  
16 universities' websites and press releases. Patient-targeted dissemination will involve local and  
17 national advocate groups and offices for senior affairs. In addition, we will disseminate the  
18 results by distribution of materials in plain language.  
19  
20  
21  
22  
23  
24  
25  
26  
27

### 28 29 **Full references**

- 30 1. WHO. Obesity and overweight. Available from: [https://www.who.int/news-room/fact-](https://www.who.int/news-room/fact-sheets/detail/obesity-and-overweight)  
31 [sheets/detail/obesity-and-overweight](https://www.who.int/news-room/fact-sheets/detail/obesity-and-overweight) accessed 08.08.2020.
- 32 2. Collaborators GBDO, Afshin A, Forouzanfar MH, et al. Health Effects of Overweight and  
33 Obesity in 195 Countries over 25 Years. *N Engl J Med* 2017;377(1):13-27. doi:  
34 10.1056/NEJMoa1614362 [published Online First: 2017/06/12]
- 35 3. He W, Goodkind D, Kowal P. U.S. Census Bureau, International Population Reports, P95/16-  
36 1, An Aging World: 2015, U.S. Government Publishing Office, Washington, DC, 2016.
- 37 4. Hales CM, Fryar CD, Carroll MD, et al. Trends in Obesity and Severe Obesity Prevalence in  
38 US Youth and Adults by Sex and Age, 2007-2008 to 2015-2016. *JAMA*  
39 2018;319(16):1723-25. doi: 10.1001/jama.2018.3060
- 40 5. Batsis JA, Mackenzie TA, Bartels SJ, et al. Diagnostic accuracy of body mass index to identify  
41 obesity in older adults: NHANES 1999-2004. *Int J Obes (Lond)* 2016;40(5):761-67. doi:  
42 10.1038/ijo.2015.243 [published Online First: 2015/12/01]
- 43 6. Germain CM, Vasquez E, Batsis JA. Physical Activity, Central Adiposity, and Functional  
44 Limitations in Community-Dwelling Older Adults. *J Geriatr Phys Ther* 2016;39(2):71-76.  
45 doi: 10.1519/JPT.0000000000000051
- 46 7. Kemmler W, Teschler M, Weißenfels A, et al. Prevalence of sarcopenia and sarcopenic  
47 obesity in older German men using recognized definitions: high accordance but low  
48 overlap! *Osteoporos Int* 2017;28(6):1881-91. doi: 10.1007/s00198-017-3964-9  
49 [published Online First: 2017/02/20]
- 50 8. Kemmler W, von Stengel S, Engelke K, et al. Prevalence of sarcopenic obesity in Germany  
51 using established definitions: Baseline data of the FORMOsA study. *Osteoporos Int*  
52 2016;27(1):275-81. doi: 10.1007/s00198-015-3303-y [published Online First:  
53 2015/08/29]
- 54 9. Batsis JA, Barre LK, Mackenzie TA, et al. Variation in the prevalence of sarcopenia and  
55 sarcopenic obesity in older adults associated with different research definitions: dual-  
56  
57  
58  
59  
60

- energy X-ray absorptiometry data from the National Health and Nutrition Examination Survey 1999-2004. *J Am Geriatr Soc* 2013;61(6):974-80. doi: 10.1111/jgs.12260 [published Online First: 2013/05/06]
10. Atkins JL, Whincup PH, Morris RW, et al. Sarcopenic obesity and risk of cardiovascular disease and mortality: a population-based cohort study of older men. *J Am Geriatr Soc* 2014;62(2):253-60. doi: 10.1111/jgs.12652 [published Online First: 2014/01/15]
  11. Global BMIMC, Di Angelantonio E, Bhupathiraju S, et al. Body-mass index and all-cause mortality: individual-participant-data meta-analysis of 239 prospective studies in four continents. *Lancet* 2016;388(10046):776-86. doi: 10.1016/S0140-6736(16)30175-1 [published Online First: 2016/07/13]
  12. Laxy M, Teuner C, Holle R, et al. The association between BMI and health-related quality of life in the US population: sex, age and ethnicity matters. *Int J Obes (Lond)* 2018;42(3):318-26. doi: 10.1038/ijo.2017.252 [published Online First: 2017/10/10]
  13. Cho Y, Shin S-Y, Shin M-J. Sarcopenic obesity is associated with lower indicators of psychological health and quality of life in Koreans. *Nutr Res* 2015;35(5):384-92. doi: 10.1016/j.nutres.2015.04.002 [published Online First: 2015/04/10]
  14. Greenberg JA. The obesity paradox in the US population. *Am J Clin Nutr* 2013;97(6):1195-200. doi: 10.3945/ajcn.112.045815 [published Online First: 2013/05/03]
  15. Romero-Corral A, Montori VM, Somers VK, et al. Association of bodyweight with total mortality and with cardiovascular events in coronary artery disease: a systematic review of cohort studies. *Lancet* 2006;368(9536):666-78. doi: 10.1016/s0140-6736(06)69251-9 [published Online First: 2006/08/22]
  16. Whelton SP, McAuley PA, Dardari Z, et al. Association of BMI, Fitness, and Mortality in Patients With Diabetes: Evaluating the Obesity Paradox in the Henry Ford Exercise Testing Project (FIT Project) Cohort. *Diabetes Care* 2020;43(3):677-82. doi: 10.2337/dc19-1673 [published Online First: 2020/01/18]
  17. Badrick E, Sperrin M, Buchan IE, et al. Obesity paradox and mortality in adults with and without incident type 2 diabetes: a matched population-level cohort study. *BMJ Open Diabetes Res Care* 2017;5(1):e000369. doi: 10.1136/bmjdr-2016-000369 [published Online First: 2017/03/23]
  18. Banack HR, Kaufman JS. The "obesity paradox" explained. *Epidemiology* 2013;24(3):461-2. doi: 10.1097/EDE.0b013e31828c776c [published Online First: 2013/04/04]
  19. Preston SH, Stokes A. Obesity paradox: conditioning on disease enhances biases in estimating the mortality risks of obesity. *Epidemiology* 2014;25(3):454-61. doi: 10.1097/ede.0000000000000075 [published Online First: 2014/03/13]
  20. Villareal DT, Apovian CM, Kushner RF, et al. Obesity in older adults: technical review and position statement of the American Society for Nutrition and NAASO, The Obesity Society. *Obes Res* 2005;13(11):1849-63. doi: 10.1038/oby.2005.228
  21. Silverwood V, Blagojevic-Bucknall M, Jinks C, et al. Current evidence on risk factors for knee osteoarthritis in older adults: a systematic review and meta-analysis. *Osteoarthritis Cartilage* 2015;23(4):507-15. doi: 10.1016/j.joca.2014.11.019 [published Online First: 2014/11/29]
  22. Cross M, Smith E, Hoy D, et al. The global burden of hip and knee osteoarthritis: estimates from the global burden of disease 2010 study. *Ann Rheum Dis* 2014;73(7):1323-30. doi: 10.1136/annrheumdis-2013-204763 [published Online First: 2014/02/19]
  23. Schaap LA, Koster A, Visser M. Adiposity, muscle mass, and muscle strength in relation to functional decline in older persons. *Epidemiol Rev* 2013;35:51-65. doi: 10.1093/epirev/mxs006 [published Online First: 2012/12/04]

- 1
  - 2
  - 3
  - 4
  - 5
  - 6
  - 7
  - 8
  - 9
  - 10
  - 11
  - 12
  - 13
  - 14
  - 15
  - 16
  - 17
  - 18
  - 19
  - 20
  - 21
  - 22
  - 23
  - 24
  - 25
  - 26
  - 27
  - 28
  - 29
  - 30
  - 31
  - 32
  - 33
  - 34
  - 35
  - 36
  - 37
  - 38
  - 39
  - 40
  - 41
  - 42
  - 43
  - 44
  - 45
  - 46
  - 47
  - 48
  - 49
  - 50
  - 51
  - 52
  - 53
  - 54
  - 55
  - 56
  - 57
  - 58
  - 59
  - 60
24. Guralnik JM, Ferrucci L, Pieper CF, et al. Lower extremity function and subsequent disability: consistency across studies, predictive models, and value of gait speed alone compared with the short physical performance battery. *J Gerontol A Biol Sci Med Sci* 2000;55(4):M221-M31. doi: 10.1093/gerona/55.4.m221
25. Guralnik JM, Simonsick EM, Ferrucci L, et al. A short physical performance battery assessing lower extremity function: association with self-reported disability and prediction of mortality and nursing home admission. *J Gerontol* 1994;49(2):M85-M94. doi: 10.1093/geronj/49.2.m85
26. Baumgartner RN, Wayne SJ, Waters DL, et al. Sarcopenic obesity predicts instrumental activities of daily living disability in the elderly. *Obes Res* 2004;12(12):1995-2004. doi: 10.1038/oby.2004.250
27. Rolland Y, Lauwers-Cances V, Cristini C, et al. Difficulties with physical function associated with obesity, sarcopenia, and sarcopenic-obesity in community-dwelling elderly women: the EPIDOS (EPIDemiologie de l'OSteoporose) Study. *Am J Clin Nutr* 2009;89(6):1895-900. doi: 10.3945/ajcn.2008.26950 [published Online First: 2009/04/15]
28. Himes CL, Reynolds SL. Effect of obesity on falls, injury, and disability. *J Am Geriatr Soc* 2012;60(1):124-29. doi: 10.1111/j.1532-5415.2011.03767.x [published Online First: 2011/12/08]
29. Scott D, Chandrasekara SD, Laslett LL, et al. Associations of Sarcopenic Obesity and Dynapenic Obesity with Bone Mineral Density and Incident Fractures Over 5-10 Years in Community-Dwelling Older Adults. *Calcif Tissue Int* 2016;99(1):30-42. doi: 10.1007/s00223-016-0123-9 [published Online First: 2016/03/04]
30. Follis S, Cook A, Bea JW, et al. Association Between Sarcopenic Obesity and Falls in a Multiethnic Cohort of Postmenopausal Women. *J Am Geriatr Soc* 2018;66(12):2314-20. doi: 10.1111/jgs.15613 [published Online First: 2018/10/30]
31. Scott D, Seibel M, Cumming R, et al. Sarcopenic Obesity and Its Temporal Associations With Changes in Bone Mineral Density, Incident Falls, and Fractures in Older Men: The Concord Health and Ageing in Men Project. *J Bone Miner Res* 2017;32(3):575-83. doi: 10.1002/jbmr.3016 [published Online First: 2016/11/03]
32. Zizza CA, Herring A, Stevens J, et al. Obesity affects nursing-care facility admission among whites but not blacks. *Obes Res* 2002;10(8):816-23. doi: 10.1038/oby.2002.110
33. Alley DE, Ferrucci L, Barbagallo M, et al. A research agenda: the changing relationship between body weight and health in aging. *J Gerontol A Biol Sci Med Sci* 2008;63(11):1257-59. doi: 10.1093/gerona/63.11.1257
34. Fried LP, Tangen CM, Walston J, et al. Frailty in older adults: evidence for a phenotype. *J Gerontol A Biol Sci Med Sci* 2001;56(3):M146-M56. doi: 10.1093/gerona/56.3.m146
35. Rockwood K, Stadnyk K, MacKnight C, et al. A brief clinical instrument to classify frailty in elderly people. *Lancet* 1999;353(9148):205-06. doi: 10.1016/S0140-6736(98)04402-X
36. Kent S, Fusco F, Gray A, et al. Body mass index and healthcare costs: a systematic literature review of individual participant data studies. *Obes Rev* 2017;18(8):869-79. doi: 10.1111/obr.12560 [published Online First: 2017/05/22]
37. Calculating the costs of the consequences of obesity 2017. Available from: <https://www.worldobesity.org/resources/resource-library/calculating-the-costs-of-the-consequences-of-obesity> accessed 08.08.2020.
38. Alfadda AA, Al-Dhwayan MM, Alharbi AA, et al. The Saudi clinical practice guideline for the management of overweight and obesity in adults. *Saudi Med J* 2016;37(10):1151-62. doi: 10.15537/smj.2016.10.14353

- 1
  - 2
  - 3
  - 4
  - 5
  - 6
  - 7
  - 8
  - 9
  - 10
  - 11
  - 12
  - 13
  - 14
  - 15
  - 16
  - 17
  - 18
  - 19
  - 20
  - 21
  - 22
  - 23
  - 24
  - 25
  - 26
  - 27
  - 28
  - 29
  - 30
  - 31
  - 32
  - 33
  - 34
  - 35
  - 36
  - 37
  - 38
  - 39
  - 40
  - 41
  - 42
  - 43
  - 44
  - 45
  - 46
  - 47
  - 48
  - 49
  - 50
  - 51
  - 52
  - 53
  - 54
  - 55
  - 56
  - 57
  - 58
  - 59
  - 60
39. Hauner H, Moss A, Berg A, et al. Interdisziplinäre Leitlinie der Qualität S3 zur „Prävention und Therapie der Adipositas“. *Adipositas-Ursachen, Folgeerkrankungen, Therapie* 2014;8(04):179-221.
40. Kushner RF, Ryan DH. Assessment and lifestyle management of patients with obesity: clinical recommendations from systematic reviews. *JAMA* 2014;312(9):943-52. doi: 10.1001/jama.2014.10432
41. Villareal DT, Chode S, Parimi N, et al. Weight loss, exercise, or both and physical function in obese older adults. *N Engl J Med* 2011;364(13):1218-29. doi: 10.1056/NEJMoa1008234 [published Online First: 2011/04/01]
42. Porter Starr KN, Pieper CF, Orenduff MC, et al. Improved Function With Enhanced Protein Intake per Meal: A Pilot Study of Weight Reduction in Frail, Obese Older Adults. *J Gerontol A Biol Sci Med Sci* 2016;71(10):1369-75. doi: 10.1093/gerona/glv210 [published Online First: 2016/01/21]
43. Villareal DT, Aguirre L, Gurney AB, et al. Aerobic or Resistance Exercise, or Both, in Dieting Obese Older Adults. *N Engl J Med* 2017;376(20):1943-55. doi: 10.1056/NEJMoa1616338 [published Online First: 2017/05/18]
44. Miller GD, Nicklas BJ, Davis C, et al. Intensive weight loss program improves physical function in older obese adults with knee osteoarthritis. *Obesity (Silver Spring)* 2006;14(7):1219-30. doi: 10.1038/oby.2006.139 [published Online First: 2006/08/11]
45. Cetin DC, Nasr G. Obesity in the elderly: more complicated than you think. *Cleve Clin J Med* 2014;81(1):51-61. doi: 10.3949/ccjm.81a.12165
46. Weinheimer EM, Sands LP, Campbell WW. A systematic review of the separate and combined effects of energy restriction and exercise on fat-free mass in middle-aged and older adults: implications for sarcopenic obesity. *Nutr Rev* 2010;68(7):375-88. doi: 10.1111/j.1753-4887.2010.00298.x
47. Soltani S, Hunter GR, Kazemi A, et al. The effects of weight loss approaches on bone mineral density in adults: a systematic review and meta-analysis of randomized controlled trials. *Osteoporos Int* 2016;27(9):2655-71. doi: 10.1007/s00198-016-3617-4 [published Online First: 2016/05/06]
48. Mathus-Vliegen EMH, Obesity Management Task Force of the European Association for the Study of O. Prevalence, pathophysiology, health consequences and treatment options of obesity in the elderly: a guideline. *Obes Facts* 2012;5(3):460-83. doi: 10.1159/000341193 [published Online First: 2012/06/30]
49. Volkert D, Beck AM, Cederholm T, et al. ESPEN guideline on clinical nutrition and hydration in geriatrics. *Clin Nutr* 2019;38(1):10-47. doi: 10.1016/j.clnu.2018.05.024 [published Online First: 2018/06/18]
50. Brawley LR, Rejeski WJ, King AC. Promoting physical activity for older adults: the challenges for changing behavior. *Am J Prev Med* 2003;25(3 Suppl 2):172-83. doi: 10.1016/s0749-3797(03)00182-x
51. American College of Cardiology/American Heart Association Task Force on Practice Guidelines OEP. Expert Panel Report: Guidelines (2013) for the management of overweight and obesity in adults. *Obesity (Silver Spring)* 2014;22 Suppl 2:S41-S410. doi: 10.1002/oby.20660
52. Jensen MD, Ryan DH, Apovian CM, et al. 2013 AHA/ACC/TOS guideline for the management of overweight and obesity in adults: a report of the American College of Cardiology/American Heart Association Task Force on Practice Guidelines and The Obesity Society. *Circulation* 2014;129(25 Suppl 2):S102-S38. doi: 10.1161/01.cir.0000437739.71477.ee [published Online First: 2013/11/12]



- 1
  - 2
  - 3
  - 4
  - 5
  - 6
  - 7
  - 8
  - 9
  - 10
  - 11
  - 12
  - 13
  - 14
  - 15
  - 16
  - 17
  - 18
  - 19
  - 20
  - 21
  - 22
  - 23
  - 24
  - 25
  - 26
  - 27
  - 28
  - 29
  - 30
  - 31
  - 32
  - 33
  - 34
  - 35
  - 36
  - 37
  - 38
  - 39
  - 40
  - 41
  - 42
  - 43
  - 44
  - 45
  - 46
  - 47
  - 48
  - 49
  - 50
  - 51
  - 52
  - 53
  - 54
  - 55
  - 56
  - 57
  - 58
  - 59
  - 60
53. Bales CW, Buhr G. Is obesity bad for older persons? A systematic review of the pros and cons of weight reduction in later life. *J Am Med Dir Assoc* 2008;9(5):302-12. doi: 10.1016/j.jamda.2008.01.006
54. Batsis JA, Gill LE, Masutani RK, et al. Weight Loss Interventions in Older Adults with Obesity: A Systematic Review of Randomized Controlled Trials Since 2005. *J Am Geriatr Soc* 2017;65(2):257-68. doi: 10.1111/jgs.14514 [published Online First: 2016/09/19]
55. Bouaziz W, Schmitt E, Kaltenbach G, et al. Health benefits of endurance training alone or combined with diet for obese patients over 60: a review. *Int J Clin Pract* 2015;69(10):1032-49. doi: 10.1111/ijcp.12648 [published Online First: 2015/05/11]
56. Felix HC, West DS. Effectiveness of weight loss interventions for obese older adults. *Am J Health Promot* 2013;27(3):191-99. doi: 10.4278/ajhp.110617-LIT-259
57. Haywood C, Sumithran P. Treatment of obesity in older persons-A systematic review. *Obes Rev* 2019;20(4):588-98. doi: 10.1111/obr.12815 [published Online First: 2019/01/15]
58. McTigue KM, Hess R, Ziouras J. Obesity in older adults: a systematic review of the evidence for diagnosis and treatment. *Obesity (Silver Spring)* 2006;14(9):1485-97. doi: 10.1038/oby.2006.171
59. Poggiogalle E, Migliaccio S, Lenzi A, et al. Treatment of body composition changes in obese and overweight older adults: insight into the phenotype of sarcopenic obesity. *Endocrine* 2014;47(3):699-716. doi: 10.1007/s12020-014-0315-x [published Online First: 2014/06/22]
60. Porter Starr KN, McDonald SR, Bales CW. Obesity and physical frailty in older adults: a scoping review of lifestyle intervention trials. *J Am Med Dir Assoc* 2014;15(4):240-50. doi: 10.1016/j.jamda.2013.11.008 [published Online First: 2014/01/17]
61. Rejeski WJ, Marsh AP, Chmelo E, et al. Obesity, intentional weight loss and physical disability in older adults. *Obes Rev* 2010;11(9):671-85. doi: 10.1111/j.1467-789X.2009.00679.x
62. Waters DL, Ward AL, Villareal DT. Weight loss in obese adults 65years and older: a review of the controversy. *Exp Gerontol* 2013;48(10):1054-61. doi: 10.1016/j.exger.2013.02.005 [published Online First: 2013/02/10]
63. Witham MD, Avenell A. Interventions to achieve long-term weight loss in obese older people: a systematic review and meta-analysis. *Age Ageing* 2010;39(2):176-84. doi: 10.1093/ageing/afp251 [published Online First: 2010/01/18]
64. Greaves C, Poltawski L, Garside R, et al. Understanding the challenge of weight loss maintenance: a systematic review and synthesis of qualitative research on weight loss maintenance. *Health Psychol Rev* 2017;11(2):145-63. doi: 10.1080/17437199.2017.1299583 [published Online First: 2017/04/07]
65. Catalogue of Bias Collaboration, Brassey J, Spencer EA, Heneghan C. Language bias. In: Catalogue Of Bias 2017. Available from: <https://catalogofbias.org/biases/language-bias/> accessed 08.08.2020.
66. Puljak L. If there is only one author or only one database was searched, a study should not be called a systematic review. *J Clin Epidemiol* 2017;91:4-5. doi: 10.1016/j.jclinepi.2017.08.002 [published Online First: 2017/08/18]
67. Ard JD, Gower B, Hunter G, et al. Effects of Calorie Restriction in Obese Older Adults: The CROSSROADS Randomized Controlled Trial. *J Gerontol A Biol Sci Med Sci* 2017;73(1):73-80. doi: 10.1093/gerona/glw237
68. Beavers KM, Nesbit BA, Kiel JR, et al. Effect of an Energy-Restricted, Nutritionally Complete, Higher Protein Meal Plan on Body Composition and Mobility in Older Adults

- 1  
2  
3 With Obesity: A Randomized Controlled Trial. *J Gerontol A Biol Sci Med Sci*  
4 2019;74(6):929-35. doi: 10.1093/gerona/gly146  
5  
6 69. Cumpston M, Li T, Page MJ, et al. Updated guidance for trusted systematic reviews: a new  
7 edition of the Cochrane Handbook for Systematic Reviews of Interventions. *Cochrane*  
8 *Database Syst Rev* 2019;10:ED000142-ED42. doi: 10.1002/14651858.ED000142  
9  
10 70. Higgins JPT TJ, Chandler J, Cumpston M, Li T, Page MJ, Welch VA. (editors). Cochrane  
11 Handbook for Systematic Reviews of Interventions. 2nd Edition: Chichester (UK): John  
12 Wiley & Sons 2019.  
13  
14 71. Jackson SE, Holter L, Beeken RJ. 'Just because I'm old it doesn't mean I have to be fat': a  
15 qualitative study exploring older adults' views and experiences of weight  
16 management. *BMJ Open* 2019;9(2):e025680-e80. doi: 10.1136/bmjopen-2018-025680  
17  
18 72. Moher D, Shamseer L, Clarke M, et al. Preferred reporting items for systematic review and  
19 meta-analysis protocols (PRISMA-P) 2015 statement. *Syst Rev* 2015;4(1):1-1. doi:  
20 10.1186/2046-4053-4-1  
21  
22 73. Chaimani A, Caldwell DM, Li T, et al. Additional considerations are required when  
23 preparing a protocol for a systematic review with multiple interventions. *J Clin*  
24 *Epidemiol* 2017;83:65-74. doi: 10.1016/j.jclinepi.2016.11.015 [published Online First:  
25 2017/01/11]  
26  
27 74. Shenkin SD, Harrison JK, Wilkinson T, et al. Systematic reviews: guidance relevant for  
28 studies of older people. *Age Ageing* 2017;46(5):722-28. doi: 10.1093/ageing/afx105  
29  
30 75. Torbahn G, Schoene D, Schwingshackl L, et al. EffectiveSLOPE: EffectS of Lifestyle  
31 interventions in Obese older PEople – a systematic review and network meta-analysis.  
32 PROSPERO 2019 CRD42019147286 2019. Available from:  
33 [https://www.crd.york.ac.uk/prospero/display\\_record.php?ID=CRD42019147286](https://www.crd.york.ac.uk/prospero/display_record.php?ID=CRD42019147286)  
34 accessed 08.08.2020.  
35  
36 76. NHS England. Improving care for older people. Available from:  
37 [https://www.england.nhs.uk/ourwork/clinical-policy/older-people/improving-care-](https://www.england.nhs.uk/ourwork/clinical-policy/older-people/improving-care-for-older-people/)  
38 [for-older-people/](https://www.england.nhs.uk/ourwork/clinical-policy/older-people/improving-care-for-older-people/) accessed 08.08.2020.  
39  
40 77. World Health Organisation. Physical Status: The use and interpretation of anthropometry.  
41 Technical Report Series 854, Geneva, 1995.  
42  
43 78. Han TS, van Leer EM, Seidell JC, et al. Waist circumference action levels in the identification  
44 of cardiovascular risk factors: prevalence study in a random sample. *BMJ*  
45 1995;311(7017):1401-05. doi: 10.1136/bmj.311.7017.1401  
46  
47 79. Batsis JA, Zagaria AB. Addressing Obesity in Aging Patients. *Med Clin North Am*  
48 2018;102(1):65-85. doi: 10.1016/j.mcna.2017.08.007 [published Online First:  
49 2017/10/21]  
50  
51 80. Valiyeva E, Russell LB, Miller JE, et al. Lifestyle-related risk factors and risk of future nursing  
52 home admission. *Arch Intern Med* 2006;166(9):985-90. doi:  
53 10.1001/archinte.166.9.985  
54  
55 81. Astbury NM, Piernas C, Hartmann-Boyce J, et al. A systematic review and meta-analysis of  
56 the effectiveness of meal replacements for weight loss. *Obes Rev* 2019;20(4):569-87.  
57 doi: 10.1111/obr.12816 [published Online First: 2019/01/24]  
58  
59 82. American College of Sports M, Chodzko-Zajko WJ, Proctor DN, et al. American College of  
60 Sports Medicine position stand. Exercise and physical activity for older adults. *Med Sci*  
*Sports Exerc* 2009;41(7):1510-30. doi: 10.1249/MSS.0b013e3181a0c95c  
61  
62 83. National Health and Medical Research Council (2013) Clinical practice guidelines for the  
management of overweight and obesity in adults, adolescents and children in  
Australia. Melbourne: National Health and Medical Research Council. Available from:

- 1  
2  
3 [https://www.nhmrc.gov.au/about-us/publications/clinical-practice-guidelines-](https://www.nhmrc.gov.au/about-us/publications/clinical-practice-guidelines-management-overweight-and-obesity#block-views-block-file-attachments-content-block-1)  
4 [management-overweight-and-obesity#block-views-block-file-attachments-content-](https://www.nhmrc.gov.au/about-us/publications/clinical-practice-guidelines-management-overweight-and-obesity#block-views-block-file-attachments-content-block-1)  
5 [block-1](https://www.nhmrc.gov.au/about-us/publications/clinical-practice-guidelines-management-overweight-and-obesity#block-views-block-file-attachments-content-block-1) accessed 08.08.2020.  
6  
7 84. Wong SKW, Smith HE, Chua JJS, et al. Effectiveness of self-management interventions in  
8 young adults with type 1 and 2 diabetes: a systematic review and meta-analysis. *Diabet*  
9 *Med* 2020;37(2):229-41. doi: 10.1111/dme.14190 [published Online First: 2019/11/27]  
10  
11 85. Stutzer A, Meier AN. Limited Self-control, Obesity, and the Loss of Happiness. *Health Econ*  
12 2016;25(11):1409-24. doi: 10.1002/hec.3227 [published Online First: 2015/09/01]  
13  
14 86. Teixeira PJ, Carraça EV, Marques MM, et al. Successful behavior change in obesity  
15 interventions in adults: a systematic review of self-regulation mediators. *BMC Med*  
16 2015;13:84. doi: 10.1186/s12916-015-0323-6 [published Online First: 2015/04/25]  
17  
18 87. Reuben DB, Siu AL. An objective measure of physical function of elderly outpatients. The  
19 Physical Performance Test. *J Am Geriatr Soc* 1990;38(10):1105-12. doi:  
20 10.1111/j.1532-5415.1990.tb01373.x  
21  
22 88. Ware JE, Jr., Sherbourne CD. The MOS 36-item short-form health survey (SF-36). I.  
23 Conceptual framework and item selection. *Med Care* 1992;30(6):473-83.  
24  
25 89. EuroQol Group. EuroQol--a new facility for the measurement of health-related quality of  
26 life. *Health Policy* 1990;16(3):199-208. doi: 10.1016/0168-8510(90)90421-9  
27  
28 90. Mead E, Brown T, Rees K, et al. Diet, physical activity and behavioural interventions for the  
29 treatment of overweight or obese children from the age of 6 to 11 years. *Cochrane*  
30 *Database Syst Rev* 2017;6(6):CD012651-CD51. doi: 10.1002/14651858.CD012651  
31  
32 91. Recker RR, Davies KM, Dowd RM, et al. The effect of low-dose continuous estrogen and  
33 progesterone therapy with calcium and vitamin D on bone in elderly women. A  
34 randomized, controlled trial. *Ann Intern Med* 1999;130(11):897-904.  
35  
36 92. Sterne JAC, Savović J, Page MJ, et al. RoB 2: a revised tool for assessing risk of bias in  
37 randomised trials. *BMJ* 2019;366:l4898-l98. doi: 10.1136/bmj.l4898  
38  
39 93. Reid IR, Ames RW, Evans MC, et al. Long-term effects of calcium supplementation on bone  
40 loss and fractures in postmenopausal women: a randomized controlled trial [see  
41 comments]. *Am J Med* 1995;98(4):331-35.  
42  
43 94. Brignardello-Petersen R, Bonner A, Alexander PE, et al. Advances in the GRADE approach  
44 to rate the certainty in estimates from a network meta-analysis. *J Clin Epidemiol*  
45 2018;93:36-44. doi: 10.1016/j.jclinepi.2017.10.005 [published Online First:  
46 2017/10/17]  
47  
48 95. Puhan MA, Schünemann HJ, Murad MH, et al. A GRADE Working Group approach for rating  
49 the quality of treatment effect estimates from network meta-analysis. *BMJ*  
50 2014;349:g5630-g30. doi: 10.1136/bmj.g5630  
51  
52 96. Yepes-Nuñez JJ, Li S-A, Guyatt G, et al. Development of the summary of findings table for  
53 network meta-analysis. *J Clin Epidemiol* 2019;115:1-13. doi:  
54 10.1016/j.jclinepi.2019.04.018 [published Online First: 2019/05/02]  
55  
56 97. Deng HW, Stegman MR, Davies KM, et al. Genetic determination of variation and  
57 covariation of peak bone mass at the hip and spine. *J Clin Densitom* 1999;2(3):251-63.  
58  
59 98. Anzures-Cabrera J, Sarpatwari A, Higgins JP. Expressing findings from meta-analyses of  
60 continuous outcomes in terms of risks. *Stat Med* 2011;30(25):2967-85. doi:  
10.1002/sim.4298 [published Online First: 2011/08/08]  
99. Deeks JJ, Higgins JPT, Altman DG (editors). Chapter 10: Analysing data and undertaking  
meta-analyses. In: Higgins JPT, Thomas J, Chandler J, Cumpston M, Li T, Page MJ, Welch  
VA (editors). *Cochrane Handbook for Systematic Reviews of Interventions* version 6.0

- (updated July 2019). Cochrane, 2019. Available from [www.training.cochrane.org/handbook](http://www.training.cochrane.org/handbook).
100. Rücker G. Network meta-analysis, electrical networks and graph theory. *Res Synth Methods* 2012;3(4):312-24. doi: 10.1002/jrsm.1058 [published Online First: 2012/09/25]
101. Stern Y, Tang MX, Albert MS, et al. Predicting time to nursing home care and death in individuals with Alzheimer disease. *JAMA* 1997;277(10):806-12.
102. Salanti G. Indirect and mixed-treatment comparison, network, or multiple-treatments meta-analysis: many names, many benefits, many concerns for the next generation evidence synthesis tool. *Res Synth Methods* 2012;3(2):80-97. doi: 10.1002/jrsm.1037 [published Online First: 2012/06/11]
103. Rücker G, Schwarzer G. Automated drawing of network plots in network meta-analysis. *Res Synth Methods* 2016;7(1):94-107. doi: 10.1002/jrsm.1143
104. Krahn U, Binder H, König J. A graphical tool for locating inconsistency in network meta-analyses. *BMC Med Res Methodol* 2013;13:35-35. doi: 10.1186/1471-2288-13-35
105. Pillay J, Armstrong MJ, Butalia S, et al. Behavioral Programs for Type 2 Diabetes Mellitus: A Systematic Review and Network Meta-analysis. *Ann Intern Med* 2015;163(11):848-60. doi: 10.7326/m15-1400 [published Online First: 2015/09/29]
106. Rücker G, Petropoulou M, Schwarzer G. Network meta-analysis of multicomponent interventions. *Biom J* 2019:10.1002/bimj.201800167. doi: 10.1002/bimj.201800167
107. Rücker G, Schwarzer G. Ranking treatments in frequentist network meta-analysis works without resampling methods. *BMC Med Res Methodol* 2015;15:58-58. doi: 10.1186/s12874-015-0060-8

### Authors' contributions

GT, DS and EK planned and designed this project, drafted the manuscript and approved the final version. LS, GR, HK, WK, CCS, JAB, DTV, NSB, and DV were involved in the planning and design process of this project, provided critical feedback for the manuscript and approved the final version. EK will be the guarantor of the review.

### Funding statement

This work was funded by the German Federal Ministry of Education and Research (BMBF) grant number [01KG1903].

### Competing interests' statement

GT, DS, GR, HK, WK, CCS, DTV, NSB, DV & EK declare no conflict of interest. LS is a member of the GRADE working group. JAB is funded by the National Institute on Aging and Office of Dietary Supplements of the National Institutes of Health under Award Number K23AG051681, and the R01 AG067416. The funder had no role in preparing the protocol and manuscript.

### Acknowledgements

We thank the information specialist Edith Motschall for reviewing the search strategy.

1  
2  
3  
4  
5  
6  
7  
8  
9  
10  
11  
12  
13  
14  
15  
16  
17  
18  
19  
20  
21  
22  
23  
24  
25  
26  
27  
28  
29  
30  
31  
32  
33  
34  
35  
36  
37  
38  
39  
40  
41  
42  
43  
44  
45  
46  
47  
48  
49  
50  
51  
52  
53  
54  
55  
56  
57  
58  
59  
60

For peer review only

**PRISMA-P (Preferred Reporting Items for Systematic review and Meta-Analysis Protocols) 2015 checklist: recommended items to address in a systematic review protocol\***

| Section and topic                 | Item No | Checklist item                                                                                                                                                                                                                | Page(s)       |
|-----------------------------------|---------|-------------------------------------------------------------------------------------------------------------------------------------------------------------------------------------------------------------------------------|---------------|
| <b>ADMINISTRATIVE INFORMATION</b> |         |                                                                                                                                                                                                                               |               |
| Title:                            |         |                                                                                                                                                                                                                               |               |
| Identification                    | 1a      | Identify the report as a protocol of a systematic review                                                                                                                                                                      | 1             |
| Update                            | 1b      | If the protocol is for an update of a previous systematic review, identify as such                                                                                                                                            | n.a.          |
| Registration                      | 2       | If registered, provide the name of the registry (such as PROSPERO) and registration number                                                                                                                                    | 2,7           |
| Authors:                          |         |                                                                                                                                                                                                                               |               |
| Contact                           | 3a      | Provide name, institutional affiliation, e-mail address of all protocol authors; provide physical mailing address of corresponding author                                                                                     | 1             |
| Contributions                     | 3b      | Describe contributions of protocol authors and identify the guarantor of the review                                                                                                                                           | 21            |
| Amendments                        | 4       | If the protocol represents an amendment of a previously completed or published protocol, identify as such and list changes; otherwise, state plan for documenting important protocol amendments                               | n.a.          |
| Support:                          |         |                                                                                                                                                                                                                               |               |
| Sources                           | 5a      | Indicate sources of financial or other support for the review                                                                                                                                                                 | 21            |
| Sponsor                           | 5b      | Provide name for the review funder and/or sponsor                                                                                                                                                                             | 21            |
| Role of sponsor or funder         | 5c      | Describe roles of funder(s), sponsor(s), and/or institution(s), if any, in developing the protocol                                                                                                                            | 21            |
| <b>INTRODUCTION</b>               |         |                                                                                                                                                                                                                               |               |
| Rationale                         | 6       | Describe the rationale for the review in the context of what is already known                                                                                                                                                 | 4-6           |
| Objectives                        | 7       | Provide an explicit statement of the question(s) the review will address with reference to participants, interventions, comparators, and outcomes (PICO)                                                                      | 6-7           |
| <b>METHODS</b>                    |         |                                                                                                                                                                                                                               |               |
| Eligibility criteria              | 8       | Specify the study characteristics (such as PICO, study design, setting, time frame) and report characteristics (such as years considered, language, publication status) to be used as criteria for eligibility for the review | 7-10          |
| Information sources               | 9       | Describe all intended information sources (such as electronic databases, contact with study authors, trial registers or other grey literature sources) with planned dates of coverage                                         | 10            |
| Search strategy                   | 10      | Present draft of search strategy to be used for at least one electronic database, including planned limits, such that it could be                                                                                             | Supplementary |

|                                    | repeated                                                                                                                                                                                                                                             | file 2 |
|------------------------------------|------------------------------------------------------------------------------------------------------------------------------------------------------------------------------------------------------------------------------------------------------|--------|
| Study records:                     |                                                                                                                                                                                                                                                      |        |
| Data management                    | 11a Describe the mechanism(s) that will be used to manage records and data throughout the review                                                                                                                                                     | 10     |
| Selection process                  | 11b State the process that will be used for selecting studies (such as two independent reviewers) through each phase of the review (that is, screening, eligibility and inclusion in meta-analysis)                                                  | 10     |
| Data collection process            | 11c Describe planned method of extracting data from reports (such as piloting forms, done independently, in duplicate), any processes for obtaining and confirming data from investigators                                                           | 10     |
| Data items                         | 12 List and define all variables for which data will be sought (such as PICO items, funding sources), any pre-planned data assumptions and simplifications                                                                                           | 10-11  |
| Outcomes and prioritization        | 13 List and define all outcomes for which data will be sought, including prioritization of main and additional outcomes, with rationale                                                                                                              | 8-9    |
| Risk of bias in individual studies | 14 Describe anticipated methods for assessing risk of bias of individual studies, including whether this will be done at the outcome or study level, or both; state how this information will be used in data synthesis                              | 11     |
| Data synthesis                     | 15a Describe criteria under which study data will be quantitatively synthesised                                                                                                                                                                      | 12-13  |
|                                    | 15b If data are appropriate for quantitative synthesis, describe planned summary measures, methods of handling data and methods of combining data from studies, including any planned exploration of consistency (such as $I^2$ , Kendall's $\tau$ ) | 12-13  |
|                                    | 15c Describe any proposed additional analyses (such as sensitivity or subgroup analyses, meta-regression)                                                                                                                                            | 12-13  |
|                                    | 15d If quantitative synthesis is not appropriate, describe the type of summary planned                                                                                                                                                               | n.a.   |
| Meta-bias(es)                      | 16 Specify any planned assessment of meta-bias(es) (such as publication bias across studies, selective reporting within studies)                                                                                                                     | 12     |
| Confidence in cumulative evidence  | 17 Describe how the strength of the body of evidence will be assessed (such as GRADE)                                                                                                                                                                | 11-12  |

**\*It is strongly recommended that this checklist be read in conjunction with the PRISMA-P Explanation and Elaboration (cite when available) for important clarification on the items. Amendments to a review protocol should be tracked and dated. The copyright for PRISMA-P (including checklist) is held by the PRISMA-P Group and is distributed under a Creative Commons Attribution Licence 4.0.**

*From: Shamseer L, Moher D, Clarke M, Ghersi D, Liberati A, Petticrew M, Shekelle P, Stewart L, PRISMA-P Group. Preferred reporting items for systematic review and meta-analysis protocols (PRISMA-P) 2015: elaboration and explanation. BMJ. 2015 Jan 2;349(jan02 1):g7647.*

Database(s): Ovid MEDLINE(R) ALL

| #  | Searches                                                        |
|----|-----------------------------------------------------------------|
| 1  | obesity/                                                        |
| 2  | obesity, morbid/                                                |
| 3  | obesity, abdominal/                                             |
| 4  | obesity, metabolically benign/                                  |
| 5  | overweight/                                                     |
| 6  | (adipos* or obes* or overweight* or over weight*).ti,ab,kf.     |
| 7  | or/1-6 [Obesity]                                                |
| 8  | exp behavior therapy/                                           |
| 9  | exp counseling/                                                 |
| 10 | social support/                                                 |
| 11 | program evaluation/                                             |
| 12 | exp exercise/                                                   |
| 13 | exp exercise therapy/                                           |
| 14 | exp "physical education and training"/                          |
| 15 | exp exercise movement techniques/                               |
| 16 | exp physical fitness/                                           |
| 17 | accidental falls/                                               |
| 18 | postural balance/                                               |
| 19 | motor activity/                                                 |
| 20 | gait/                                                           |
| 21 | exp muscle strength/                                            |
| 22 | exp diet/                                                       |
| 23 | exp diet therapy/                                               |
| 24 | fasting/                                                        |
| 25 | food preferences/                                               |
| 26 | patient education as topic/                                     |
| 27 | health education/                                               |
| 28 | exp health behavior/                                            |
| 29 | exp health promotion/                                           |
| 30 | life style/                                                     |
| 31 | ((obesity adj3 intervention) or program or programme).ti,ab,kf. |
| 32 | (lifestyle or life style).ti,ab,kf.                             |
| 33 | exercis*.ti,ab,kf.                                              |
| 34 | (physic* adj (activ* or fit*)).ti,ab,kf.                        |



|    |                                                                                                                                                                                                                               |
|----|-------------------------------------------------------------------------------------------------------------------------------------------------------------------------------------------------------------------------------|
| 35 | (walk* or swim* or aqua or cycl* or weight lift* or danc* or aerobics or balance or electric* muscle stimulation or neuromuscular electric* stimulation or electromyostimulation or ems).ti,ab,kf.                            |
| 36 | ((physic* or strength* or resist* or circuit or weight or aerob* or cross or endurance or vibration*) adj3 train*).ti,ab,kf.                                                                                                  |
| 37 | (behavio?ral or behavio?r modification* or psychoth* or psychosocial).ti,ab,kf.                                                                                                                                               |
| 38 | ((group or cognit* or behav*) adj therap*).ti,ab,kf.                                                                                                                                                                          |
| 39 | counsel?ing.ti,ab,kf.                                                                                                                                                                                                         |
| 40 | educat*.ti,ab,kf.                                                                                                                                                                                                             |
| 41 | (diet* or healthy nutrition or (nutrition* adj (knowledge or educat* or therap* or program* or intervention*))).ti,ab,kf.                                                                                                     |
| 42 | (low-calori* or calori* restrict* or low-energ* or energ* restrict* or low-carbohydrate or high-carbohydrate or low-fat or high-fat or low-protein or high-protein or vegetarian or vegan or mediterranean or dash).ti,ab,kf. |
| 43 | weight loss/                                                                                                                                                                                                                  |
| 44 | (weight adj1 (reduc* or los* or control* or manag*).ti,ab,kf.                                                                                                                                                                 |
| 45 | or/8-44 [Interventions]                                                                                                                                                                                                       |
| 46 | obesity/ or obesity, abdominal/ or obesity, morbid/ or overweight/ or obesity, metabolically benign/                                                                                                                          |
| 47 | (diet therapy or prevention & control or rehabilitation or therapy or psychology).fs.                                                                                                                                         |
| 48 | 46 and 47 [MeSH/subheading combination]                                                                                                                                                                                       |
| 49 | exp weight reduction programs/                                                                                                                                                                                                |
| 50 | or/48-49 [Obesity-specific interventions]                                                                                                                                                                                     |
| 51 | 7 and 45 [Obesity AND Interventions]                                                                                                                                                                                          |
| 52 | or/50-51 [Obesity interventions complete: (Obesity AND Interventions) OR Obesity-specific interventions]                                                                                                                      |
| 53 | exp aged/                                                                                                                                                                                                                     |
| 54 | geriatrics/                                                                                                                                                                                                                   |
| 55 | frailty/                                                                                                                                                                                                                      |
| 56 | sarcopenia/                                                                                                                                                                                                                   |
| 57 | Independent Living/                                                                                                                                                                                                           |
| 58 | ((old* or senior or age*) adj2 (adult* or person* or subject* or individual* or people or group* or m?n or wom?n or patient* or client* or outpatient* or citizen* or "60" or "65" or age*).ti,ab,kf.                         |
| 59 | (elder* or eldes* or geriat* or geronto* or frail* or sarcopen* or senior* or agedly or ag?ing).ti,ab,kf.                                                                                                                     |
| 60 | community-dwell*.ti,ab,kf.                                                                                                                                                                                                    |
| 61 | ((commun* or indepen*) adj1 (dwell* or livi*).ti,ab,kf.                                                                                                                                                                       |
| 62 | (("60" or "65") adj1 year*).ti,ab,kf.                                                                                                                                                                                         |
| 63 | ((advanc* or high*) adj1 age*).ti,ab,kf.                                                                                                                                                                                      |

|    |                                                                                                                                             |
|----|---------------------------------------------------------------------------------------------------------------------------------------------|
| 64 | (super adj1 age*).ti,ab,kf.                                                                                                                 |
| 65 | (superage* or super-age* or centen* or centa* or nonagen* or octagen* or sept?agen* or supercenten* or senium*).ti,ab,kf.                   |
| 66 | or/53-65 [Age group]                                                                                                                        |
| 67 | randomized controlled trial.pt.                                                                                                             |
| 68 | controlled clinical trial.pt.                                                                                                               |
| 69 | randomi?ed.ab.                                                                                                                              |
| 70 | placebo.ab.                                                                                                                                 |
| 71 | clinical trials as topic.sh.                                                                                                                |
| 72 | randomly.ab.                                                                                                                                |
| 73 | trial.ti.                                                                                                                                   |
| 74 | or/67-73                                                                                                                                    |
| 75 | exp animals/ not humans.sh.                                                                                                                 |
| 76 | 74 not 75 [Study filter (Cochrane Handbook v5.0.2 2008 RCT filter - sensitivity and precision maximizing version)]                          |
| 77 | 52 and 66 [Obesity interventions complete AND Age group]                                                                                    |
| 78 | 77 and 76 [Obesity interventions complete AND Age group AND Study filter]                                                                   |
| 79 | (exp infant/ or exp child/ or adolescent/ or young adult/ or middle aged/) not exp aged/ [Child/adolescent/middle aged adults-only studies] |
| 80 | 78 not 79 [Remove Child/adolescent/middle aged adults-only studies]                                                                         |
