# Supplementary material for: Effective SLOPE: EffectS of Lifestyle interventions in Older PEople with obesity: a systematic review and network meta-analysis protocol
Source: PubMed Central journal article supplement — BMJ Open. 2020 Oct 7;10(10):e038330. doi: 10.1136/bmjopen-2020-038330 (PMC7542917; doi:10.1136/bmjopen-2020-038330), 2020-10-07
Supplement: bmjopen-2020-038330supp002.pdf [file bmjopen-2020-038330supp002.pdf]

Database(s): Ovid MEDLINE(R) ALL

| #  | Searches                                                        |
|----|-----------------------------------------------------------------|
| 1  | obesity/                                                        |
| 2  | obesity, morbid/                                                |
| 3  | obesity, abdominal/                                             |
| 4  | obesity, metabolically benign/                                  |
| 5  | overweight/                                                     |
| 6  | (adipos* or obes* or overweight* or over weight*).ti,ab,kf.     |
| 7  | or/1-6 [Obesity]                                                |
| 8  | exp behavior therapy/                                           |
| 9  | exp counseling/                                                 |
| 10 | social support/                                                 |
| 11 | program evaluation/                                             |
| 12 | exp exercise/                                                   |
| 13 | exp exercise therapy/                                           |
| 14 | exp "physical education and training"/                          |
| 15 | exp exercise movement techniques/                               |
| 16 | exp physical fitness/                                           |
| 17 | accidental falls/                                               |
| 18 | postural balance/                                               |
| 19 | motor activity/                                                 |
| 20 | gait/                                                           |
| 21 | exp muscle strength/                                            |
| 22 | exp diet/                                                       |
| 23 | exp diet therapy/                                               |
| 24 | fasting/                                                        |
| 25 | food preferences/                                               |
| 26 | patient education as topic/                                     |
| 27 | health education/                                               |
| 28 | exp health behavior/                                            |
| 29 | exp health promotion/                                           |
| 30 | life style/                                                     |
| 31 | ((obesity adj3 intervention) or program or programme).ti,ab,kf. |
| 32 | (lifestyle or life style).ti,ab,kf.                             |
| 33 | exercis*.ti,ab,kf.                                              |
| 34 | (physic* adj (activ* or fit*)).ti,ab,kf.                        |

|    |                                                                                                                                                                                                                               |
|----|-------------------------------------------------------------------------------------------------------------------------------------------------------------------------------------------------------------------------------|
| 35 | (walk* or swim* or aqua or cycl* or weight lift* or danc* or aerobics or balance or electric* muscle stimulation or neuromuscular electric* stimulation or electromyostimulation or ems).ti,ab,kf.                            |
| 36 | ((physic* or strength* or resist* or circuit or weight or aerob* or cross or endurance or vibration*) adj3 train*).ti,ab,kf.                                                                                                  |
| 37 | (behavio?ral or behavio?r modification* or psychoth* or psychosocial).ti,ab,kf.                                                                                                                                               |
| 38 | ((group or cognit* or behav*) adj therap*).ti,ab,kf.                                                                                                                                                                          |
| 39 | counsel?ing.ti,ab,kf.                                                                                                                                                                                                         |
| 40 | educat*.ti,ab,kf.                                                                                                                                                                                                             |
| 41 | (diet* or healthy nutrition or (nutrition* adj (knowledge or educat* or therap* or program* or intervention*))).ti,ab,kf.                                                                                                     |
| 42 | (low-calori* or calori* restrict* or low-energ* or energ* restrict* or low-carbohydrate or high-carbohydrate or low-fat or high-fat or low-protein or high-protein or vegetarian or vegan or mediterranean or dash).ti,ab,kf. |
| 43 | weight loss/                                                                                                                                                                                                                  |
| 44 | (weight adj1 (reduc* or los* or control* or manag*).ti,ab,kf.                                                                                                                                                                 |
| 45 | or/8-44 [Interventions]                                                                                                                                                                                                       |
| 46 | obesity/ or obesity, abdominal/ or obesity, morbid/ or overweight/ or obesity, metabolically benign/                                                                                                                          |
| 47 | (diet therapy or prevention & control or rehabilitation or therapy or psychology).fs.                                                                                                                                         |
| 48 | 46 and 47 [MeSH/subheading combination]                                                                                                                                                                                       |
| 49 | exp weight reduction programs/                                                                                                                                                                                                |
| 50 | or/48-49 [Obesity-specific interventions]                                                                                                                                                                                     |
| 51 | 7 and 45 [Obesity AND Interventions]                                                                                                                                                                                          |
| 52 | or/50-51 [Obesity interventions complete: (Obesity AND Interventions) OR Obesity-specific interventions]                                                                                                                      |
| 53 | exp aged/                                                                                                                                                                                                                     |
| 54 | geriatrics/                                                                                                                                                                                                                   |
| 55 | frailty/                                                                                                                                                                                                                      |
| 56 | sarcopenia/                                                                                                                                                                                                                   |
| 57 | Independent Living/                                                                                                                                                                                                           |
| 58 | ((old* or senior or age*) adj2 (adult* or person* or subject* or individual* or people or group* or m?n or wom?n or patient* or client* or outpatient* or citizen* or "60" or "65" or age*).ti,ab,kf.                         |
| 59 | (elder* or eldes* or geriat* or geronto* or frail* or sarcopen* or senior* or agedly or ag?ing).ti,ab,kf.                                                                                                                     |
| 60 | community-dwell*.ti,ab,kf.                                                                                                                                                                                                    |
| 61 | ((commun* or indepen*) adj1 (dwell* or livi*).ti,ab,kf.                                                                                                                                                                       |
| 62 | ((("60" or "65") adj1 year*).ti,ab,kf.                                                                                                                                                                                        |
| 63 | ((advanc* or high*) adj1 age*).ti,ab,kf.                                                                                                                                                                                      |

|    |                                                                                                                                             |
|----|---------------------------------------------------------------------------------------------------------------------------------------------|
| 64 | (super adj1 age*).ti,ab,kf.                                                                                                                 |
| 65 | (superage* or super-age* or centen* or centa* or nonagen* or octagen* or sept?agen* or supercenten* or senium*).ti,ab,kf.                   |
| 66 | or/53-65 [Age group]                                                                                                                        |
| 67 | randomized controlled trial.pt.                                                                                                             |
| 68 | controlled clinical trial.pt.                                                                                                               |
| 69 | randomi?ed.ab.                                                                                                                              |
| 70 | placebo.ab.                                                                                                                                 |
| 71 | clinical trials as topic.sh.                                                                                                                |
| 72 | randomly.ab.                                                                                                                                |
| 73 | trial.ti.                                                                                                                                   |
| 74 | or/67-73                                                                                                                                    |
| 75 | exp animals/ not humans.sh.                                                                                                                 |
| 76 | 74 not 75 [Study filter (Cochrane Handbook v5.0.2 2008 RCT filter - sensitivity and precision maximizing version)]                          |
| 77 | 52 and 66 [Obesity interventions complete AND Age group]                                                                                    |
| 78 | 77 and 76 [Obesity interventions complete AND Age group AND Study filter]                                                                   |
| 79 | (exp infant/ or exp child/ or adolescent/ or young adult/ or middle aged/) not exp aged/ [Child/adolescent/middle aged adults-only studies] |
| 80 | 78 not 79 [Remove Child/adolescent/middle aged adults-only studies]                                                                         |
